1 **Title**

2 Translational inhibition and phase separation primes the epigenetic silencing of transposons

3

4 **Author**

5 Eun Yu Kim<sup>1,4</sup>, Ling Wang<sup>1,4</sup>, Zhen Lei<sup>1,2,4</sup>, Hui Li<sup>1,2</sup>, Wenwen Fan<sup>1,2</sup> and Jungnam Cho<sup>1,2,3\*</sup>

6 <sup>1</sup> National Key Laboratory of Plant Molecular Genetics, CAS Center for Excellence in

7 Molecular Plant Sciences, Shanghai Institute of Plant Physiology and Ecology, Chinese

8 Academy of Sciences, Shanghai 200032, China.

9 <sup>2</sup> University of Chinese Academy of Sciences, Shanghai 200032, China.

10 <sup>3</sup> CAS-JIC Centre of Excellence for Plant and Microbial Science, Chinese Academy of

11 Sciences, Shanghai 200032, China.

12 <sup>4</sup> These authors contributed equally to this work.

13 \* Corresponding author.

14

15 **Correspondence**

16 Jungnam Cho (jungnamcho@sippe.ac.cn).

17

18

## 19 **Abstract**

20 Transposons are mobile DNAs that can cause fatal mutations. To counteract these  
21 genome invaders, the host genomes deploy small interfering (si) RNAs to initiate and  
22 establish the epigenetic silencing. However, the regulatory mechanisms for the selective  
23 recognition of transposons by the host genomes remain still elusive. Here we show that plant  
24 transposon RNAs undergo frequent ribosome stalling caused by their inherently unfavourable  
25 codon sequence usage. The ribosome stalling then causes the RNA truncation and the  
26 localization to siRNA bodies, which are both critical prerequisites for the siRNA processing.  
27 In addition, SGS3, the key protein in the siRNA biogenesis pathway, forms liquid droplets *in*  
28 *vitro* through its prion-like domains implicating the role of liquid-liquid phase separation in  
29 the formation of the siRNA bodies. Our study provides a novel insight into the regulatory  
30 mechanisms for the recognition of invasive genetic elements which is essential for the  
31 maintenance of genome integrity.

32

33

## 34 **Keywords**

35 transposon, codon optimality, ribosome stalling, easiRNA, RDR6-RdDM, liquid-liquid phase  
36 separation, siRNA body, stress granule

37

38

## 39 Introduction

40 Transposable elements (TEs, transposons) are mobile genetic elements that jump  
41 around the genomes, and thus pose a significant threat to genome integrity<sup>1,2</sup>. The host  
42 genomes have evolved elaborate mechanisms involving various kinds of short interfering  
43 (si)-RNAs to battle against these genomic parasites<sup>2-4</sup>. In plants, the 24-nucleotide (nt)  
44 siRNAs are the predominant form of siRNAs and mediate the RNA-directed DNA  
45 methylation (RdDM) that maintains the epigenetic silencing and heterochromatin formation  
46 of transposons<sup>5</sup>. While the canonical RdDM is mainly for reinforcing the silent state of  
47 transposons, the recently proposed alternative RdDM pathway suppresses the active  
48 transposons that are induced upon the epigenetic mutations and in several development  
49 stages<sup>3,6-10</sup>. RNA-DEPENDENT RNA POLYMERASE 6 (RDR6)-SUPPRESSOR OF GENE  
50 SILENCING 3 (SGS3) complex serves as a detector of transposon RNAs that selectively  
51 processes them into 21 or 22-nt siRNAs (also referred to as epigenetically activated siRNAs,  
52 easiRNAs)<sup>11,12</sup>. Transposon-derived siRNAs trigger both post-transcriptional repression by  
53 cleaving the transposon RNAs (and then subsequently initiating the secondary siRNA  
54 biogenesis) and establishment of the epigenetic silencing by recruiting DNA  
55 methyltransferases to the target TE chromatin<sup>5,7,8</sup>. The biogenesis of 21 or 22-nt siRNAs in  
56 plants is initiated by RDR6 which is an RNA-dependent RNA polymerase that forms double-  
57 stranded RNAs by templating directly the target RNAs<sup>13</sup>. SGS3 is an RNA-binding protein  
58 that interacts with RDR6 and is essential for its function<sup>13</sup>. The duplex RNAs are then sliced  
59 to 21 or 22-nt siRNAs by DICER-LIKE 3 or 4 (DCL3/4)<sup>8,14,15</sup>. Since RDR6 templates are  
60 directly derived from the RNAs of those mobile elements, RDR6 and the resulting easiRNAs  
61 are deemed the first line of the host immune system against the invasive genetic elements.

62 The RDR6-mediated easiRNA production pathway (RDR6-RdDM) is usually  
63 prevented in the transcripts derived from genes by the RNA decay pathways<sup>16-18</sup>. This raises

64 an important question of how RDR6 specifically recognizes its TE targets and establish their  
65 epigenetic silencing. Previous reports showed that the initial cleavage of target transcripts is a  
66 critical prerequisite for RDR6 recognition<sup>19,20</sup>, however, the precise mechanisms for the  
67 initial RNA cleavage prior to easiRNA production is still unclear. Several studies attempted  
68 to answer this question by suggesting that miRNA-mediated<sup>4,8</sup> or Nonsense-Mediated RNA  
69 Decay (NMD) pathway<sup>21</sup> induces the initial cleavage of a subset of transposon RNAs.  
70 Nonetheless, the exact cellular phenomena happening to RNAs destined to the easiRNA  
71 biogenesis pathway is yet to be known.

72 The specificity of the easiRNA production pathway is also provided by spatial  
73 confinement into siRNA bodies where RDR6 and SGS3 are localized. Unfortunately, how the  
74 target TE RNAs are funnelled to the siRNA bodies are unknown. Interestingly, the siRNA  
75 bodies often colocalize with the stress granules, the membrane-less cytoplasmic organelles  
76 that are formed by OLIGOURIDYLATE-BINDING PROTEIN 1 b (UBP1b)<sup>22</sup>. UBP1b is one  
77 of the plant homologs of T-cell Intracytoplasmic Antigen 1 (TIA-1), a viral translational  
78 repressor in mammals<sup>23</sup>, and is known to suppress the translation of transposons in  
79 *Arabidopsis*<sup>24</sup>. A recent report has shown that stress granules are rich with weakly translating  
80 mRNAs in yeast and human<sup>25</sup>, further supporting the notion that stress granules are  
81 associated with the translational repression. This hints at the potential linkage of weak  
82 translation and siRNA body localization of transposons which can provide additional  
83 selectivity to TE RNAs for easiRNA production.

84 Cellular compartmentalization is a common biological phenomenon that enhances the  
85 efficiency and specificity of certain cellular pathways. Liquid-liquid phase separation (LLPS)  
86 of ribonucleoproteins has recently emerged as a potent physiochemical driver for such  
87 compartmentalization and is relevant to diverse cellular processes and human diseases<sup>26,27</sup>.  
88 LLPS usually happens to proteins containing the prion-like domains or low complexity

89 domains. Stress granule is one of the best-known cytoplasmic bodies that is formed through  
90 LLPS in human cells<sup>28-30</sup>. Despite the strong conservation of the prion-like domains,  
91 however, the plant components of stress granules and their accompanying siRNA bodies have  
92 never been assessed so far for their abilities to phase separate *in vitro*.

93         Previously, we reported that CpG dinucleotide-rich sequences exhibit epiallelic  
94 behaviour, i.e. they are less capable of regaining DNA methylation once lost<sup>31</sup>. In contrast,  
95 CpG-scarce sequences that are usually found in transposons readily regain DNA methylation  
96 presumably through the siRNAs originated from TE RNAs<sup>31</sup>. We then further extended our  
97 investigation to better understand the cellular events that connect the sequence bias of TEs to  
98 the siRNA biogenesis. In this study, we suggest that transposons are different from genes in  
99 the codon sequence usage and is rich with the codons that are unfavourable for translation.  
100 The weak translation then serves as a signal that leads to RNA truncation and siRNA body  
101 localization of transposons which are essential for easiRNA biogenesis. Besides, we  
102 demonstrate that the formation of siRNA bodies is mediated by LLPS of SGS3, implicating  
103 that phase separation is important for RDR6-RdDM pathway. Our work uncovers the general  
104 features of mobile genetic elements that are selectively guided to the siRNA biogenesis  
105 pathway, which is critical for maintaining the genome integrity.

106

107

## 108 **Results**

### 109 **Codon sequence bias and reduced translation efficiency of transposons**

110 Similar to the sequence features of high CpG density associated with the epiallelic  
111 loci in *Arabidopsis*<sup>31</sup>, several other studies also showed that GC3 contents (GC contents at the  
112 third nucleotide positions of codons) are negatively correlated with siRNAs and DNA  
113 methylation levels<sup>32–34</sup>. Besides, it has been also suggested that the expression of transposons  
114 by RNA Polymerase II is essential for the siRNA production and *de novo* DNA  
115 methylation<sup>7,12</sup>. These indicate that the unique epigenetic behaviour of transposons might be  
116 attributed to their RNA sequence feature, however, its mechanistic understanding is still  
117 largely lacking. In order to dissect the mechanisms underlying the selective recognition of  
118 TEs by the host genomes for the initiation of epigenetic silencing, we first thoroughly  
119 interrogated the base composition of coding sequences in the rice genome. As shown in Fig.  
120 1a, while the GC contents at the first and second nucleotide positions of the codons (indicated  
121 as GC1 and GC2, respectively) are similar between genes and transposons, the GC3 contents  
122 of transposons are remarkably lower than those of genes. Such divergence of codon sequence  
123 usage might contribute to weak translation of TE transcripts that was partly suggested  
124 previously for rice<sup>35</sup>. We paid attention particularly to translational repression of TEs because  
125 it often induces RNA cleavage through the so called No-Go RNA Decay (NGD) pathway<sup>36–</sup>  
126 <sup>40</sup>. In addition, the core NGD complex Pelo-Hbs1 was previously reported to suppress  
127 transposon activity in *Drosophila*<sup>41</sup>. Given that RNA truncation is an essential prerequisite  
128 for RDR6 targeting and subsequent esiRNA biogenesis, we hypothesized that the TE RNAs  
129 might be more prone to cleavage caused by the reduced translation. In order to obtain the  
130 transcriptome-wide view of transposon translation, we analysed the public translome data  
131 (PRJNA298638) generated from rice callus<sup>35</sup>. We chose rice callus because *in vitro* tissue  
132 cultured callus samples contain more active transposons<sup>42</sup>. By assessing the translational

133 efficiency index (TEI) defined as the relative level of translation to transcription, we observed  
134 that rice TEs are significantly weaker in translation than genes (Fig. 1b and c).

135 Unequal usage of synonymous codons has been observed in many organisms and such  
136 codon sequence bias impacts on various RNA processes<sup>43,44</sup>. Codon optimality, a relative  
137 ratio of optimal to suboptimal codons, is often used as a proxy for certain RNA features of  
138 interest. Such codon index derived from sequence information is particularly useful in the  
139 study of translation because weakly expressing TE transcripts are less represented in the  
140 ribosome-associated fraction and thus difficult to be assessed precisely for their translational  
141 activities. In order to assign a general measure indicative to translational potential, we first  
142 categorized the rice codons by their correlativeness to translation (Fig. 1d). For this, we  
143 analysed the codon frequencies of the annotated transcriptional units of the rice genome. The  
144 Pearson's correlation coefficient of codon frequency and TEI was defined as the codon  
145 translational coefficient (CTC) and each codon was assigned for its CTC (Fig. 1d). The  
146 expressed genes are only considered in CTC calculation to ensure that codon frequency well  
147 reflects the translational activity. As shown in Fig. 1d, the codons of rice exhibited varying  
148 levels of CTC. Noticeably, the codons ending with G or C showed positive CTC values  
149 meaning that those codons are more frequently used in the actively translating RNAs  
150 (Supplementary Fig. S1). On the other hand, A or U-ending codons showed low CTC values  
151 (Fig. 1d and Supplementary Fig. S1), which is reminiscent of the low GC3 of transposons  
152 shown in Fig. 1a. Taken together, transposons in the rice genome exhibit weak translation  
153 that is likely attributed to their codon sequence bias and the reduced translational activity may  
154 induce RNA cleavage presumably through the NGD pathway.

155

156 **Codon optimality negatively correlates with easiRNA production**

157           Based on the CTC data obtained from Fig. 1, we defined those above 0.15 of CTC  
158 values as optimal codons and those below -0.15 as suboptimal codons (Fig. 1d). We then  
159 calculated the relative log<sub>2</sub>-ratio of optimal to suboptimal codon frequencies of each  
160 transcripts that will be hereinafter referred to as codon optimality. The codon optimality  
161 showed positive correlation with TEIs (Fig. 2a), while the out-of-frame false codon  
162 optimality showed less and insignificant correlation (Fig. 2b and c). This indicates that codon  
163 optimality well reflects the translatability. It is worth mentioning that although CTC was  
164 determined only from the expressed genes, the resulting codon optimality can be assigned to  
165 any transcriptional units including transposons as long as the coding sequence is provided.

166           The codon optimality was then directly compared in genes and transposons of the rice  
167 genome. Figure 2d shows that transposons are significantly lower in the codon optimality,  
168 resembling the reduced translational activity shown in Fig. 1b. In order to see if the reduced  
169 translational activity and the low codon optimality of transposons is conserved in other  
170 species, we carried out ribosome footprint profiling sequencing (ribo-seq) experiments using  
171 the *decrease in dna methylation 1 (ddm1)* mutant of *Arabidopsis*. Similar to those of rice,  
172 *Arabidopsis* transposons were drastically reduced in translation and lower in codon  
173 optimality compared to genes (Supplementary Fig. 2), indicating that the codon sequence bias  
174 and translational repression of transposons is conserved in both monocot and dicot plants.

175           We next selected for the loci generating the easiRNAs in the rice *osmet1-2* mutant,  
176 defective in CG methylation<sup>45</sup>, and compared their codon optimality with randomly selected  
177 loci. As can be seen in Fig. 2e, the easiRNA-producing loci are lower in codon optimality,  
178 likely exhibiting weaker translational activities. Oppositely, the optimal and suboptimal  
179 transposons were selected by the codon optimality and compared for their easiRNA levels.  
180 Consistently, the suboptimal TEs produced higher levels of easiRNAs (Fig. 2f). In summary,



181 the suboptimal codon usage and the reduced translational activity of TEs is conserved in  
182 plants and correlates with active easiRNA production.

183

#### 184 **Ribosome stalling triggers RNA cleavage**

185 Translational inhibition causes ribosome stalling and in severe cases ribosome  
186 stacking or queuing<sup>40,46,47</sup>. In order to test if the reduced translational activity of transposons  
187 induces the RNA truncation which is a critical requirement for RDR6 targeting, we  
188 investigated the degradome-seq data generated from *ddm1* mutant of *Arabidopsis*<sup>8</sup>.  
189 Degradome-seq technique sequences the 5' end of the truncated RNAs and from this we  
190 determined the degradability by normalizing its levels by the RNA-seq levels. Shown in Fig.  
191 3a is the degradability of high and low TEI genes, revealing that lowly translating mRNAs  
192 are more prone to truncation (Fig. 3b). Since the siRNAs can inhibit the translational activity  
193 of mRNAs<sup>48</sup>, we wanted to test whether the weak translation of transposons is the cause or  
194 consequence of siRNA function. For this, we carried out additional ribo-seq experiments  
195 using the *ddm1 rdr6* double mutant which does express transposons but does not produce  
196 easiRNAs. Interestingly, we were not able to detect any noticeable changes of translational  
197 activities of transposons between *ddm1* and *ddm1 rdr6* double mutants (Fig. 3c). The RDR6  
198 target TEs (Fig. 3c, dots marked in red) also exhibited comparable levels of translational  
199 efficiency in both mutants, indicating that the reduced translation of TEs is less likely caused  
200 by siRNAs but rather by unfavourable codon sequence usage.

201 A previous study showed that collision of stacked ribosomes is critical for triggering  
202 NGD pathway<sup>37</sup>. Given this, we reasoned that transcripts containing the stacked ribosomes  
203 might be more frequently truncated and thus readily processed to easiRNAs. In order to  
204 profile the RNAs containing the queued ribosomes, we selected from *ddm1* ribo-seq data the  
205 di-ribosome (disome) fragment reads ranging from 40 to 65 bp (Fig. 4a). Disome fragments

206 were strongly enriched with the non-protein-coding RNAs including tRNAs and rRNAs as  
207 well as organellar RNAs, while only around 20 % was protein-coding genes (Fig. 4b), which  
208 is overall consistent with the previous reports<sup>40,47</sup>. Noticeably, disome RNAs are more  
209 strongly enriched with TEs (Fig. 4c), further supporting the notion that TE transcripts are  
210 associated with translational repression. To analyse the coding sequence features of disome  
211 RNAs, we retrieved the sequences of the disome-containing protein-coding genes and  
212 compared the codon optimality with randomly selected RNAs. As shown in Fig. 4d and e,  
213 disome RNAs showed drastically reduced codon optimality and translational efficiency,  
214 suggesting that ribosome stalling might be caused by the codon sequence usage unfavourable  
215 for translation. More importantly, disome RNAs are significantly more prone to RNA  
216 cleavage than randomly selected RNAs (Fig. 4f). We then determined the easiRNA levels of  
217 disome RNAs and indeed they produced considerably more easiRNAs than randomly chosen  
218 RNAs (Supplementary Fig. S3a). Oppositely, RDR6 target transposons were selected  
219 according to the dependency of easiRNA production on RDR6 and their codon optimality  
220 was measured. Consistently, we observed that RDR6 targets have lower codon optimality  
221 compared with randomly selected non-RDR6 targets (Supplementary Fig. S3b). In  
222 conclusion, ribosome stalling resulted from the suboptimal codon usage triggers RNA  
223 cleavage and subsequently easiRNA production.

224

## 225 **Liquid-liquid phase separation mediates the formation of siRNA bodies and SGs**

226 So far, we have shown that the unique codon sequence usage of transposons led to  
227 ribosome stalling and thereby RNA truncation which is an important prerequisite for the  
228 easiRNA production. Apart from the RNA truncation, the specificity of the easiRNA pathway  
229 is given by the spatial isolation of cytoplasmic compartments known as siRNA bodies<sup>49-52</sup>. It  
230 is well documented that non-membranous cellular compartments are formed by the liquid-

231 liquid phase separation of ribonucleoproteins<sup>27</sup>. Prion-like domains or low complexity  
232 sequences are common protein features that are frequently associated with phase-separating  
233 proteins<sup>53</sup>. Although RDR6 and SGS3 form the cytoplasmic siRNA bodies and SGS3  
234 contains the prion-like domains (Fig. 5a), their biophysical property of LLPS has never been  
235 investigated so far. In order to test if SGS3 indeed undergoes LLPS, the GFP-tagged SGS3  
236 protein of *Arabidopsis* was expressed in *E. coli* and purified for the *in vitro* phase separation  
237 assay. As shown in Fig. 5b, while the GFP alone does not form any globular protein  
238 condensates, the full-length SGS3 protein forms the liquid droplets *in vitro* which is a typical  
239 feature of LLPS. In order to demonstrate that the phase separation behaviour of SGS3 is  
240 dependent on the prion-like domains, we deleted the prion-like domains and purified the  
241 truncated SGS3 proteins. The SGS3 protein without prion-like domains did not exhibit any  
242 phase-separating behaviour, suggesting that the LLPS of SGS3 is mediated by the prion-like  
243 domains (Fig. 5b). To further demonstrate the fluidity and dynamicity of SGS3 protein  
244 droplets, which is an important characteristic of phase-separating proteins, we carried out the  
245 time-lapse microscope imaging analysis of SGS3 protein droplets. Figure 5c shows the  
246 fluorescence microscope images of two adjacent SGS3 protein droplets which are fusing  
247 together within only several seconds (Supplementary Movie S1). Additionally, we performed  
248 Fluorescence Recovery After Photobleaching (FRAP) assay and observed that the lesions of  
249 the photobleached SGS3 protein droplets recovered almost completely in around 30 seconds  
250 (Fig. 5d and e; Supplementary Movie S2). These altogether indicate that LLPS is an  
251 important physiochemical feature of SGS3 acting as a critical driving force for the siRNA  
252 body formation.

253         It has been well documented that the siRNA body components colocalize with  
254 UBP1b, a major stress granule (SG) core component<sup>48,49</sup>. Studies in human cells revealed that  
255 the formation of SGs is mediated by the LLPS of TIA-1, a homolog of UBP1b, through its

256 prion-like domains<sup>29,30</sup>. The SGs in plants are formed when plant cells are stressed and in the  
257 DNA methylation-deficient *ddm1* mutant of *Arabidopsis*<sup>22,48</sup>. Unfortunately, the plant UBP1b  
258 protein has never been assessed so far for its phase separation behaviour. The *Arabidopsis*  
259 UBP1b contains two prion-like domains at its both ends (Supplementary Fig. S4a),  
260 potentiating its prion-like behaviour. Indeed, our *in vitro* phase separation assay revealed that  
261 UBP1b undergoes LLPS and the prion-like domains are required for the phase separation  
262 behaviour (Supplementary Fig. S4b). Intriguingly, the phase separation activity of UBP1b  
263 was reduced as *Arabidopsis* RNAs are supplemented in the assay buffer (Supplementary Fig.  
264 S4c). This is in agreement with a previous study that RNA inhibits phase separation  
265 behaviour of prion-like RNA-binding proteins to prevent the aberrant formation of protein  
266 condensates<sup>54,55</sup>. Taken together, the formation of plant SGs and their accompanying siRNA  
267 bodies is mediated by LLPS of UBP1b and SGS3, respectively.

268

### 269 **Weakly translating RNAs are preferentially guided to cytoplasmic foci**

270 While the protein components of SGs and siRNA bodies in plants are relatively well  
271 known<sup>56</sup>, the RNA composition of such cytoplasmic compartments are poorly understood.  
272 Studies in human and yeast have shown that transcriptome of cytoplasmic RNA granules are  
273 associated with strong translational repression<sup>23,25,57,58</sup>. This led us to hypothesize that  
274 transposon RNAs might be preferably located to cytoplasmic foci including SGs and siRNA  
275 bodies presumably owing to their weak translational activities and are therefore selectively  
276 taken over to the RDR6-RdDM pathway. In order to demonstrate this hypothesis, we  
277 enriched the cytoplasmic body fraction of *ddm1* mutant using the previously established SG  
278 enrichment method<sup>25,59</sup> and sequenced the RNAs (SG-RNA-seq). By normalizing the SG-  
279 RNA-seq levels to the total RNA-seq levels we assessed the SG-enrichment of each transcript  
280 and identified 863 SG-enriched and 891 SG-depleted RNAs (Fig. 6a). Noticeably, the

281 fraction of transposons in the SG-enriched RNAs was over 35 %, while those of the SG-  
282 depleted RNAs and the expressed transcripts were only around 5 % (Fig. 6b). This data  
283 strongly supports the notion that TE transcripts in *Arabidopsis* are strongly enriched in the  
284 cytoplasmic foci. Similarly, a previous study in human cells suggested that AU-rich  
285 transcripts are strongly enriched in the cytoplasmic RNA granules<sup>60</sup>, resembling the sequence  
286 feature and cellular localization behaviour of transposons in plants. Our SG-RNA-seq also  
287 revealed that SG-enriched RNAs are remarkably lower in the RNA levels (Fig. 6c), codon  
288 optimality (Fig. 6d) and translational efficiency (Fig. 6e) but associated with higher levels of  
289 easiRNAs (Fig. 6f and g). We then directly compared the SG-enriched TEs and the targets of  
290 RDR6 and DDM1 of *Arabidopsis*, which revealed a substantially large proportion of  
291 overlapping transcripts (Supplementary Fig. S5). These data collectively indicate that TE  
292 RNAs are preferentially localized to cytoplasmic compartments including SGs and siRNA  
293 bodies where the easiRNA pathway is present, providing additional selectivity of RDR6-  
294 RdDM towards transposon RNAs.

295

296

## 297 Discussion

298 RDR6-RdDM is a critical cellular pathway in plants that detects and suppresses  
299 transposon RNAs. The aberrancy of mRNAs derived from genes are mitigated predominantly  
300 by RNA decay pathways and RDR6-RdDM is usually prevented because the resulting  
301 siRNAs may target the normal transcripts<sup>18,61-64</sup>. As illustrated in Fig. 7, we suggest that  
302 transposon RNAs, unlike genic mRNAs, are specifically detected and targeted to RDR6-  
303 RdDM by their reduced translational activities. The weak translation of TE RNAs contributes  
304 to both RNA truncation and localization to siRNA bodies which are both important for the  
305 selective easiRNA processing of transposon RNAs. Although RDR6 can target several  
306 endogenous genes to produce *trans*-acting siRNAs in normal condition<sup>13,22,65</sup>, the major RNA  
307 templates of RDR6 are those from foreign and invasive genetic elements such as virus,  
308 transgenes and transposons<sup>11,33,66</sup>. Given that non-self or alien RNAs are presumably less  
309 optimal to the host's codon usage and commonly regulated by the similar siRNA-mediated  
310 pathway, the epigenetic silencing of viral RNAs and transgenes might be triggered by the  
311 translation-coupled pathway as was seen in transposons. Therefore, our work can provide a  
312 novel framework for treating plant viral diseases and improving genetic engineering through  
313 transgene transformation.

314 We have demonstrated that the suboptimal codon usage and reduced translation of  
315 transposons is conserved in rice and *Arabidopsis*. Several other studies also showed that  
316 localization to SGs (where mRNA translation is inhibited) and ribosome stalling frequently  
317 occurs to human retroelements such as LINE-1 and *Alu*<sup>67-69</sup>. Our investigation to GC contents  
318 in several genomes of animals and invertebrates also revealed that GC3 is drastically reduced  
319 in transposons (Supplementary Fig. S6), partly indicating that the weak translation might be a  
320 general feature of transposons in eukaryotes. In addition, it has been suggested that stalled  
321 spliceosome caused by suboptimal splice sites triggers RNAi in yeast<sup>70</sup>. These altogether may

322 suggest an interesting notion that certain abnormalities of RNA processing might have been  
323 selected to serve as a signal to turn on the genome surveillance system of the hosts. Although  
324 we have shown in this study that the ribosome-stalled TE RNAs are preferentially funnelled  
325 to the easiRNA production pathway in the siRNA bodies, the precise regulatory mechanisms  
326 for the specific guidance to particular cytoplasmic compartments are yet to be concluded.  
327 Moreover, the NGD pathway was suggested to trigger RNA truncation at the ribosome-  
328 stalled sites, however, whether the RDR6-RdDM requires the NGD or not is to be confirmed.

329 RDR6 and AGO7 are known to function in conjunction with SGS3 and colocalize  
330 together in the cytoplasmic siRNA bodies<sup>49</sup>. However, we were not able to find any prion-  
331 like domains in RDR6 and AGO7 (Supplementary Fig. S7), suggesting that they might be  
332 guided to siRNA bodies possibly via the physical interaction with SGS3. Several other  
333 studies have shown that LLPS can be enhanced when additional biomolecules are  
334 supplemented<sup>55,71,72</sup>. In this regard, the functional role of the interacting proteins on the phase  
335 separation behaviour of SGS3 and the formation of siRNA bodies will be worth to be  
336 followed and investigated. In addition, our interrogation of prion-like domains in the small  
337 RNA pathway factors revealed that AGO1, 2, 3 and 5 contain prion-like domains at their N  
338 termini (Supplementary Fig. S7). This may suggest that apart from the easiRNA pathway,  
339 other cellular processes involving small RNAs in plants can also be mediated by LLPS.

340 In summary, the specific recognition of transposons and their targeting to siRNA  
341 biogenesis pathway is critical for perpetual maintenance of the genome integrity. In plants,  
342 the host genomes detect and discriminate transposon RNAs by their reduced translational  
343 activity. The weak translation then causes RNA truncation and siRNA body localization  
344 which together provide selectivity to TE RNAs for siRNA production. The specificity of  
345 siRNA pathway is further secured by the formation of siRNA body which is mediated by the  
346 phase separation of SGS3 protein.

347

## 348 **Methods**

### 349 **Plant materials and growth condition**

350 *Arabidopsis* seeds of Columbia-0 (Col-0), *ddm1-2* (selfed for five generations) and  
351 *ddm1-2 rdr6-11* double mutants (genotyped from F2 segregation population derived from  
352 *ddm1-2* and *rdr6-11* crosses) were surface-sterilized in 75 % ethanol and germinated on half-  
353 strength Murashige and Skoog media. Plants grown for 10 days under 16 h light/8 h dark  
354 cycling at 22 °C were collected for RNA-seq, SG-RNA-seq and ribo-seq.

355

### 356 **Codon sequence analysis**

357 Codon frequency was calculated for the coding sequences of rice and *Arabidopsis*  
358 using the R package “seqinr”. We used rice MSU7 and *Arabidopsis* TAIR10 version of  
359 genome assembly and annotation downloaded from  
360 [http://rice.plantbiology.msu.edu/pub/data/Eukaryotic\\_Projects/o\\_sativa/annotation\\_dbs/](http://rice.plantbiology.msu.edu/pub/data/Eukaryotic_Projects/o_sativa/annotation_dbs/) for  
361 rice and <ftp://ftp.arabidopsis.org/home/tair> for *Arabidopsis*. Codon translation coefficient was  
362 defined as the Pearson’s correlation coefficient between the codon frequency and translation  
363 efficiency of genes that have the FPKM value of at least 1. Optimal codons and suboptimal  
364 codons (Fig. 1d) are those above 0.15 and below -0.15 of CTC, respectively. The log2-ratio  
365 of optimal to suboptimal codon frequency of individual transcript is defined as codon  
366 optimality.

367

### 368 **Next-generation sequencing (NGS) library construction**

369 For RNA-seq, the mRNAs were purified from 3 µg of total RNA using poly-T oligo-  
370 attached magnetic beads. Library preparation was carried out using the NEBNext® Ultra™  
371 RNA Library Prep Kit (NEB) following the manufacturer’s instruction. Sequencing was  
372 performed on an Illumina HiSeq platform and 150 bp paired-end reads were generated.



373 For ribo-seq, the plant samples were lysed and digested by RNase I, then ribosome  
374 protected fragments (RPFs) were purified using the MicroSpin S-400 columns (GE  
375 Healthcare). After rRNA depletion, the RPFs were purified by polyacrylamide gel  
376 electrophoresis (PAGE). Then, the 5' and 3' adapters were ligated following the end-repair  
377 and dA-tailing. The adapter-ligated cDNAs were obtained by the one-step reverse  
378 transcription and PAGE purification. After PCR amplification and PAGE purification, the  
379 sequencing library was prepared using the NEBNext® Multiplex Small RNA Library Prep  
380 Kit (NEB) and the resulting library was loaded onto an Illumina HiSeq X machine for PE150  
381 sequencing.

382

### 383 **NGS data analysis**

384 For RNA-seq data analysis, the raw data were first processed through the in-house  
385 Perl scripts to remove reads containing adapter, poly-N and low-quality sequences. Clean  
386 reads were then aligned to the rice (MSU7) and the *Arabidopsis* reference genome (TAIR10)  
387 in default settings using Hisat2 (version 2.0.5). The FPKM of gene and transposons were  
388 calculated by StringTie (version 1.3.5). Visualization of the sequencing data was performed  
389 using the Integrative Genomics Viewer (IGV).

390 For ribo-seq data analysis, the software Cutadapt (version 1.12) was first used to trim  
391 adapter sequences and the reads between 20-50 bp were retained. FASTX\_toolkit (version  
392 0.0.14) was used to filter out the low-quality reads and Bowtie (version 1.0.1, parameter -l  
393 20) to filter out the structural and ribosomal RNA reads. The kept reads were aligned to the  
394 genome by Tophat2 and the cufflinks (version 2.2.1) were employed to calculate FPKM. For  
395 disome analysis, the reads between 40-65 bp after removal of adapters were selected and no  
396 filtering was performed for the non-coding RNAs.

397 Public datasets used in this study are from PRJNA298638 (rice TRAP-seq)<sup>35</sup>,  
398 SRP043448 (rice small RNA-seq)<sup>45</sup> and GSE52952 (*Arabidopsis* small RNA-seq and  
399 degradome-seq)<sup>8</sup>.

400

#### 401 **Enrichment of cytoplasmic bodies**

402 The enrichment of cytoplasmic bodies was carried out by employing the SG  
403 enrichment methods reported previously<sup>25,56,59</sup>. Briefly, 2 g of samples was ground with a  
404 precooled mortar and pestle in liquid nitrogen. The ground samples were collected into 50 ml  
405 conical tube and resuspended in 5 mL of SG lysis buffer (50 mM Tris-HCl pH 7.4, 100 mM  
406 KOAc, 2 mM MgOAc, 0.5 mM DTT, 0.5% NP40, Complete EDTA-free Protease Inhibitor  
407 Cocktail (Roche), 1 U/mL of RNasin Plus RNase Inhibitor (Promega)). The resulting slurry  
408 was centrifuged at 4,000 g for 10 min at 4 °C, the supernatant was removed, and the pellet  
409 was resuspended in 2 ml of lysis buffer. The samples were again centrifuged at 18,000 g for  
410 10 min at 4°C. The pellets were resuspended in 2 ml lysis buffer, vortexed and centrifuged at  
411 18,000 g at 4 °C for 10 min. The supernatant was discarded and the pellets were resuspended  
412 in 1 ml of lysis buffer. After a final centrifugation at 850 g for 10 min at 4°C, the supernatant  
413 (enriched with SGs) was transferred to a new 1.5 ml microcentrifuge tube and purified using  
414 the RNeasy Plant Mini Kit (QIAGEN).

415

#### 416 **Protein sequence analysis**

417 Protein domains were predicted by SMART (<http://smart.embl-heidelberg.de/>) using  
418 the full-length amino acid sequences. Prediction of prion-like domains was performed using  
419 the web-based tool, PLAAC (<http://plaac.wi.mit.edu/>).

420

#### 421 **Protein expression and purification**

422 To produce the recombinant proteins, the coding sequences of *Arabidopsis* genes  
423 were PCR amplified from the reverse-transcribed cDNAs prepared from Col-0 seedling  
424 samples using the specific primers listed in the Supplementary Table S1. The amplified DNA  
425 was then cloned into the modified pET28a (Novagen) expression vector containing the N-  
426 terminal eGFP that was introduced between BamHI and EcoRI sites. The expression of GFP-  
427 SGS3 protein was induced in *Escherichia coli* Rosetta (DE3) (Novagen) by adding 0.1 mM  
428 isopropyl  $\beta$ -d-1-thiogalactopyranoside (IPTG) at 16 °C overnight. The collected cells are  
429 resuspended in the lysis buffer (20 mM Tris-HCl pH 7.6, 200 mM NaCl, 10 % Glycerol,  
430 0.1 % Tween20, 1 mM PMSF) and lysed by sonication, then centrifuged at 20,000 g for 45  
431 min at 4 °C. The supernatants were purified with Ni-NTA (Qiagen) in the elution buffer (250  
432 mM imidazole in lysis buffer) according to the manufacturer's instructions and further  
433 purified using the Superdex 200 increase 10/300 column. The purified proteins were stored in  
434 the storage buffer (20mM HEPES pH 7.4, 150 mM KCl, 1 mM DTT) at 100  $\mu$ M of protein  
435 concentration until used.

436

#### 437 ***In vitro* phase separation assay**

438 For *in vitro* liquid droplet assembly, 10  $\mu$ M of purified proteins mixed with PEG8000  
439 (NEB) at 10% (w/v) was used. GFP fluorescence was imaged using a Zeiss LSM880  
440 confocal microscopy equipped with 40 $\times$ /1.1 water immersion objective and the GaAsP  
441 spectral detector. The GFP was excited at 488 nm and detected at 491-535 nm.

442

#### 443 **Microscopy analysis**

444 For time-lapse microscopy, GFP fluorescence was observed under Zeiss LSM880  
445 confocal microscope. Images were acquired every 3 sec for 5 min. At each time point,

446 maximum projections from z-stack of 14 steps with step size of 0.6  $\mu\text{m}$  were applied. Image  
447 analysis was performed with FIJI/ImageJ.

448 FRAP assay of GFP-SGS3 was performed on a Zeiss LSM880 Airy scan confocal  
449 microscope. Photobleaching was done using a 488 nm laser pulse. Recovery was recorded  
450 every second for 5 min.

451

#### 452 **Resource availability**

453 The NGS data generated in this study are deposited to SRA repository under  
454 PRJNA598331 [<https://www.ncbi.nlm.nih.gov/sra/PRJNA598331>]. The analyses were  
455 performed using the standard codes instructed by the tools described in the Methods.

456

457

## 458 **References**

- 459 1. Slotkin, R. K. & Martienssen, R. Transposable elements and the epigenetic regulation  
460 of the genome. *Nat. Rev. Genet.* **8**, 272–285 (2007).
- 461 2. Girard, A. & Hannon, G. J. Conserved themes in small-RNA-mediated transposon  
462 control. *Trends Cell Biol.* **18**, 136–148 (2008).
- 463 3. Slotkin, R. K. *et al.* Epigenetic Reprogramming and Small RNA Silencing of  
464 Transposable Elements in Pollen. *Cell* **136**, 461–472 (2009).
- 465 4. Borges, F. & Martienssen, R. A. The expanding world of small RNAs in plants. *Nat.*  
466 *Rev. Mol. Cell Biol.* **16**, 727–741 (2015).
- 467 5. Matzke, M. A. & Mosher, R. A. RNA-directed DNA methylation: An epigenetic  
468 pathway of increasing complexity. *Nat. Rev. Genet.* **15**, 394–408 (2014).
- 469 6. Fultz, D., Choudury, S. G. & Slotkin, R. K. Silencing of active transposable elements  
470 in plants. *Curr. Opin. Plant Biol.* **27**, 67–76 (2015).
- 471 7. Fultz, D. & Slotkin, R. K. Exogenous transposable elements circumvent identity-based  
472 silencing, permitting the dissection of expression-dependent silencing. *Plant Cell* **29**,  
473 360–376 (2017).
- 474 8. Creasey, K. M. *et al.* MiRNAs trigger widespread epigenetically activated siRNAs  
475 from transposons in Arabidopsis. *Nature* **508**, 411–415 (2014).
- 476 9. Martínez, G. & Slotkin, R. K. Developmental relaxation of transposable element  
477 silencing in plants: Functional or byproduct? *Curr. Opin. Plant Biol.* **15**, 496–502  
478 (2012).

- 479 10. Cho, J. Transposon-Derived Non-coding RNAs and Their Function in Plants. *Front.*  
480 *Plant Sci.* **9**, 1–6 (2018).
- 481 11. Nuthikattu, S. *et al.* The initiation of epigenetic silencing of active transposable  
482 elements is triggered by RDR6 and 21-22 nucleotide small interfering RNAs. *Plant*  
483 *Physiol.* **162**, 116–131 (2013).
- 484 12. Panda, K. *et al.* Full-length autonomous transposable elements are preferentially  
485 targeted by expression-dependent forms of RNA-directed DNA methylation. *Genome*  
486 *Biol.* **17**, (2016).
- 487 13. Peragine, A., Yoshikawa, M., Wu, G., Albrecht, H. L. & Poethig, R. S. SGS3 and  
488 SGS2/SDE1/RDR6 are required for juvenile development and the production of trans-  
489 acting siRNAs in Arabidopsis. *Genes Dev.* **3**, 2368–2379 (2004).
- 490 14. Song, X. *et al.* Roles of DCL4 and DCL3b in rice phased small RNA biogenesis. *Plant*  
491 *J.* **69**, 462–474 (2012).
- 492 15. Xie, Z., Allen, E., Wilken, A. & Carrington, J. C. DICER-LIKE 4 functions in trans-  
493 acting small interfering RNA biogenesis and vegetative phase change in Arabidopsis  
494 thaliana. *Proc. Natl. Acad. Sci. U. S. A.* **102**, 12984–12989 (2005).
- 495 16. Zhang, X. *et al.* Suppression of endogenous gene silencing by bidirectional  
496 cytoplasmic RNA decay in Arabidopsis. *Science (80-. ).* **348**, 120–123 (2015).
- 497 17. Branscheid, A. *et al.* SKI2 mediates degradation of RISC 5'-cleavage fragments and  
498 prevents secondary siRNA production from miRNA targets in Arabidopsis. *Nucleic*  
499 *Acids Res.* **43**, 10975–10988 (2015).

- 500 18. Gazzani, S., Lawrenson, T., Woodward, C., Headon, D. & Sablowski, R. A link  
501 between mRNA turnover and RNA interference in Arabidopsis. *Science (80-. )*. **306**,  
502 1046–1048 (2004).
- 503 19. Luo, Z. & Chen, Z. Improperly Terminated, Unpolyadenylated mRNA of Sense  
504 Transgenes Is Targeted by RDR6-Mediated RNA Silencing in Arabidopsis. *Plant Cell*  
505 **19**, 943–958 (2007).
- 506 20. Baeg, K., Iwakawa, H. O. & Tomari, Y. The poly(A) tail blocks RDR6 from  
507 converting self mRNAs into substrates for gene silencing. *Nat. Plants* **3**, (2017).
- 508 21. Oberlin, S., Sarazin, A., Chevalier, C., Voinnet, O. & Marí-Ordóñez, A. A genome-  
509 wide transcriptome and translome analysis of Arabidopsis transposons identifies a  
510 unique and conserved genome expression strategy for Ty1/Copia retroelements.  
511 *Genome Res.* **27**, 1549–1562 (2017).
- 512 22. Jouannet, V. *et al.* Cytoplasmic Arabidopsis AGO7 accumulates in membrane-  
513 associated siRNA bodies and is required for ta-siRNA biogenesis. *EMBO J.* **31**, 1704–  
514 1713 (2012).
- 515 23. Albornoz, A., Carletti, T., Corazza, G. & Marcello, A. The Stress Granule Component  
516 TIA-1 Binds Tick-Borne Encephalitis Virus RNA and Is Recruited to Perinuclear Sites  
517 of Viral Replication To Inhibit Viral Translation. *J. Virol.* **88**, 6611–6622 (2014).
- 518 24. McCue, A. D., Nuthikattu, S. & Slotkin, R. K. Genome-wide identification of genes  
519 regulated in trans by transposable element small interfering RNAs. *RNA Biol.* **10**,  
520 1379–1395 (2013).
- 521 25. Wheeler, J. R. *et al.* The Stress Granule Transcriptome Reveals Principles of mRNA  
522 Accumulation in Stress Granules. *Mol. Cell* **68**, 808–820.e5 (2017).

- 523 26. Cuevas-Velazquez, C. L. & Dinneny, J. R. Organization out of disorder: liquid–liquid  
524 phase separation in plants. *Curr. Opin. Plant Biol.* **45**, 68–74 (2018).
- 525 27. Hyman, A. A., Weber, C. A. & Jülicher, F. Liquid-Liquid Phase Separation in  
526 Biology. *Annu. Rev. Cell Dev. Biol.* **30**, 39–58 (2014).
- 527 28. Riback, J. A. *et al.* Stress-Triggered Phase Separation Is an Adaptive, Evolutionarily  
528 Tuned Response. *Cell* **168**, 1028–1040.e19 (2017).
- 529 29. Rayman, J. B., Karl, K. A. & Kandel, E. R. TIA-1 Self-Multimerization, Phase  
530 Separation, and Recruitment into Stress Granules Are Dynamically Regulated by Zn  
531 2+. *Cell Rep.* (2018). doi:10.1016/j.celrep.2017.12.036
- 532 30. Gilks, N. *et al.* Stress granule assembly is mediated by prion-like aggregation of TIA-  
533 1. *Mol. Biol. Cell* (2004). doi:10.1091/mbc.E04-08-0715
- 534 31. Catoni, M. *et al.* DNA sequence properties that predict susceptibility to epiallelic  
535 switching. *EMBO* **36**, 617–628 (2017).
- 536 32. Tatarinova, T., Elhaik, E. & Pellegrini, M. Cross-species analysis of genic GC3  
537 content and DNA methylation patterns. *Genome Biol. Evol.* **5**, 1443–1456 (2013).
- 538 33. Sidorenko, L. V. *et al.* GC-rich coding sequences reduce transposon-like, small RNA-  
539 mediated transgene silencing. *Nat. Plants* **3**, 875–884 (2017).
- 540 34. Tatarinova, T. V., Alexandrov, N. N., Bouck, J. B. & Feldmann, K. A. GC3biology in  
541 corn, rice, sorghum and other grasses. *BMC Genomics* **11**, (2010).
- 542 35. Zhao, D. *et al.* Analysis of ribosome-associated mRNAs in rice reveals the importance  
543 of transcript size and GC content in translation. *G3 Genes, Genomes, Genet.* **7**, 203–  
544 219 (2017).



- 545 36. Shoemaker, C. J. & Green, R. Translation drives mRNA quality control. *Nat. Struct.*  
546 *& Mol. Biol.* **19**, 594 (2012).
- 547 37. Simms, C. L., Yan, L. L. & Zaher, H. S. Ribosome Collision Is Critical for Quality  
548 Control during No-Go Decay. *Mol. Cell* **68**, 361–373.e5 (2017).
- 549 38. Harigaya, Y. & Parker, R. No-go decay: A quality control mechanism for RNA in  
550 translation. *Wiley Interdiscip. Rev. RNA* **1**, 132–141 (2010).
- 551 39. Szádeczky-Kardoss, I., Gál, L., Auber, A., Taller, J. & Silhavy, D. The No-go decay  
552 system degrades plant mRNAs that contain a long A-stretch in the coding region. *Plant*  
553 *Sci.* **275**, 19–27 (2018).
- 554 40. Ikeuchi, K. *et al.* Collided ribosomes form a unique structural interface to induce Hel2-  
555 driven quality control pathways. *EMBO J.* **38**, 1–21 (2019).
- 556 41. Yang, F. *et al.* The RNA surveillance complex Pelo-Hbs1 is required for transposon  
557 silencing in the *Drosophila* germline. *EMBO Rep.* **16**, 965–974 (2015).
- 558 42. Sabot, F. *et al.* Transpositional landscape of the rice genome revealed by paired-end  
559 mapping of high-throughput re-sequencing data. *Plant J.* **66**, 241–246 (2011).
- 560 43. Presnyak, V. Effects of Codon Usage on Mrna Translation and Decay. 120 (2015).
- 561 44. Bazzini, A. A. *et al.* Codon identity regulates mRNA stability and translation  
562 efficiency during the maternal-to-zygotic transition. *EMBO J.* **35**, 2087–2103 (2016).
- 563 45. Hu, L. *et al.* Mutation of a major CG methylase in rice causes genome-wide  
564 hypomethylation, dysregulated genome expression, and seedling lethality. *Proc. Natl.*  
565 *Acad. Sci. U. S. A.* **111**, 10642–10647 (2014).

- 566 46. Hou, C. Y. *et al.* Global analysis of truncated RNA ends reveals new insights into  
567 Ribosome Stalling in plants. *Plant Cell* **28**, 2398–2416 (2016).
- 568 47. Bulak, A., Janich, P. & Gatfield, D. Transcriptome-wide sites of collided ribosomes  
569 reveal principles of translational pausing. *bioRxiv* (2019).
- 570 48. McCue, A. D., Nuthikattu, S., Reeder, S. H. & Slotkin, R. K. Gene expression and  
571 stress response mediated by the epigenetic regulation of a transposable element small  
572 RNA. *PLoS Genet.* **8**, (2012).
- 573 49. Jouannet, V. *et al.* Cytoplasmic Arabidopsis AGO7 accumulates in membrane-  
574 associated siRNA bodies and is required for ta-siRNA biogenesis. *EMBO J.* **31**, 1704–  
575 1713 (2012).
- 576 50. Martínez-Pérez, M. *et al.* Arabidopsis m6A demethylase activity modulates viral  
577 infection of a plant virus and the m6A abundance in its genomic RNAs. *Proc. Natl.*  
578 *Acad. Sci. U. S. A.* **114**, 10755–10760 (2017).
- 579 51. Li, S. *et al.* Biogenesis of phased siRNAs on membrane-bound polysomes in  
580 Arabidopsis. *Elife* **5**, 1–24 (2016).
- 581 52. Chantarachot, T. & Bailey-Serres, J. Polysomes, stress granules, and processing  
582 bodies: A dynamic triumvirate controlling cytoplasmic mRNA fate and function. *Plant*  
583 *Physiol.* **176**, 254–269 (2018).
- 584 53. Wang, J. *et al.* A Molecular Grammar Governing the Driving Forces for Phase  
585 Separation of Prion-like RNA Binding Proteins. *Cell* **174**, 688–699.e16 (2018).
- 586 54. Maharana, S. *et al.* RNA buffers the phase separation behavior of prion-like RNA  
587 binding proteins. *Science (80-. )*. (2018). doi:10.1126/science.aar7366

- 588 55. Fang, X. *et al.* Arabidopsis FLL2 promotes liquid–liquid phase separation of  
589 polyadenylation complexes. *Nature* **569**, 265–269 (2019).
- 590 56. Kosmacz, M. *et al.* Protein and metabolite composition of Arabidopsis stress granules.  
591 *New Phytol.* **222**, 1420–1433 (2019).
- 592 57. Beckham, C. J. & Parker, R. P Bodies, Stress Granules, and Viral Life Cycles. *Cell*  
593 *Host Microbe* **3**, 206–212 (2008).
- 594 58. Sorenson, R. & Bailey-Serres, J. Selective mRNA sequestration by  
595 OLIGOURIDYLATEBINDING PROTEIN 1 contributes to translational control  
596 during hypoxia in Arabidopsis. *Proc. Natl. Acad. Sci. U. S. A.* **111**, 2373–2378 (2014).
- 597 59. Jain, S. *et al.* ATPase-Modulated Stress Granules Contain a Diverse Proteome and  
598 Substructure. *Cell* **164**, 487–498 (2016).
- 599 60. Namkoong, S., Ho, A., Woo, Y. M., Kwak, H. & Lee, J. H. Systematic  
600 Characterization of Stress-Induced RNA Granulation. *Mol. Cell* (2018).  
601 doi:10.1016/j.molcel.2018.02.025
- 602 61. De Alba, A. E. M. *et al.* In plants, decapping prevents RDR6-dependent production of  
603 small interfering RNAs from endogenous mRNAs. *Nucleic Acids Res.* **43**, 2902–2913  
604 (2015).
- 605 62. Thran, M., Link, K. & Sonnewald, U. The Arabidopsis DCP2 gene is required for  
606 proper mRNA turnover and prevents transgene silencing in Arabidopsis. *Plant J.* **72**,  
607 368–377 (2012).
- 608 63. Christie, M., Brosnan, C. A., Rothnagel, J. A. & Carroll, B. J. RNA Decay And RNA  
609 Silencing In Plants: Competition Or Collaboration? *Front. Plant Sci.* **2**, 1–7 (2011).

- 610 64. Liu, L. & Chen, X. RNA Quality Control as a Key to Suppressing RNA Silencing of  
611 Endogenous Genes in Plants. *Mol. Plant* **9**, 826–836 (2016).
- 612 65. Song, X. *et al.* Rice RNA-dependent RNA polymerase 6 acts in small RNA biogenesis  
613 and spikelet development. *Plant J.* **71**, 378–389 (2012).
- 614 66. Schwach, F., Vaistij, F. E., Jones, L. & Baulcombe, D. C. An RNA-dependent RNA  
615 polymerase prevents meristem invasion by potato virus X and is required for the  
616 activity but not the production of a systemic silencing signal. *Plant Physiol.* **138**,  
617 1842–1852 (2005).
- 618 67. Goodier, J. L., Zhang, L., Vetter, M. R. & Kazazian, H. H. LINE-1 ORF1 Protein  
619 Localizes in Stress Granules with Other RNA-Binding Proteins, Including  
620 Components of RNA Interference RNA-Induced Silencing Complex. *Mol. Cell. Biol.*  
621 **27**, 6469–6483 (2007).
- 622 68. Hu, S. *et al.* SAMHD1 Inhibits LINE-1 Retrotransposition by Promoting Stress  
623 Granule Formation. *PLoS Genet.* **11**, 1–27 (2015).
- 624 69. Ahl, V., Keller, H., Schmidt, S. & Weichenrieder, O. Retrotransposition and Crystal  
625 Structure of an Alu RNP in the Ribosome-Stalling Conformation. *Mol. Cell* **60**, 715–  
626 727 (2015).
- 627 70. Dumesic, P. A. *et al.* Stalled spliceosomes are a signal for RNAi-mediated genome  
628 defense. *Cell* **152**, 957–968 (2013).
- 629 71. Gao, Y. *et al.* Multivalent m6A motifs promote phase separation of YTHDF proteins.  
630 *Cell Research* (2019). doi:10.1038/s41422-019-0210-3

631 72. Ries, R. J. *et al.* m6A enhances the phase separation potential of mRNA. *Nature*  
632 (2019). doi:10.1038/s41586-019-1374-1

633

634

635 **Competing interests**

636 The authors declare that no conflict of interest exists.

637

638 **Acknowledgments**

639 We would like to thank Yunxiao He from the Core Facility Center, Shanghai Institute of  
640 Plant Physiology and Ecology, Chinese Academy of Sciences for the technical support on the  
641 confocal microscopy. This work was supported by the Strategic Priority Research Program of  
642 Chinese Academy of Sciences (XDB27030209) and the National Natural Science Foundation  
643 of China (31970518) granted to J.C.

644

645 **Author contributions**

646 J.C. conceived the idea and designed the experiments. E.Y.K., Z.L., H.L. and W.F. conducted  
647 the experiments. L.W., E.Y.K., Z.L. and J.C. analysed the data, wrote and revised the  
648 manuscript.

649

650

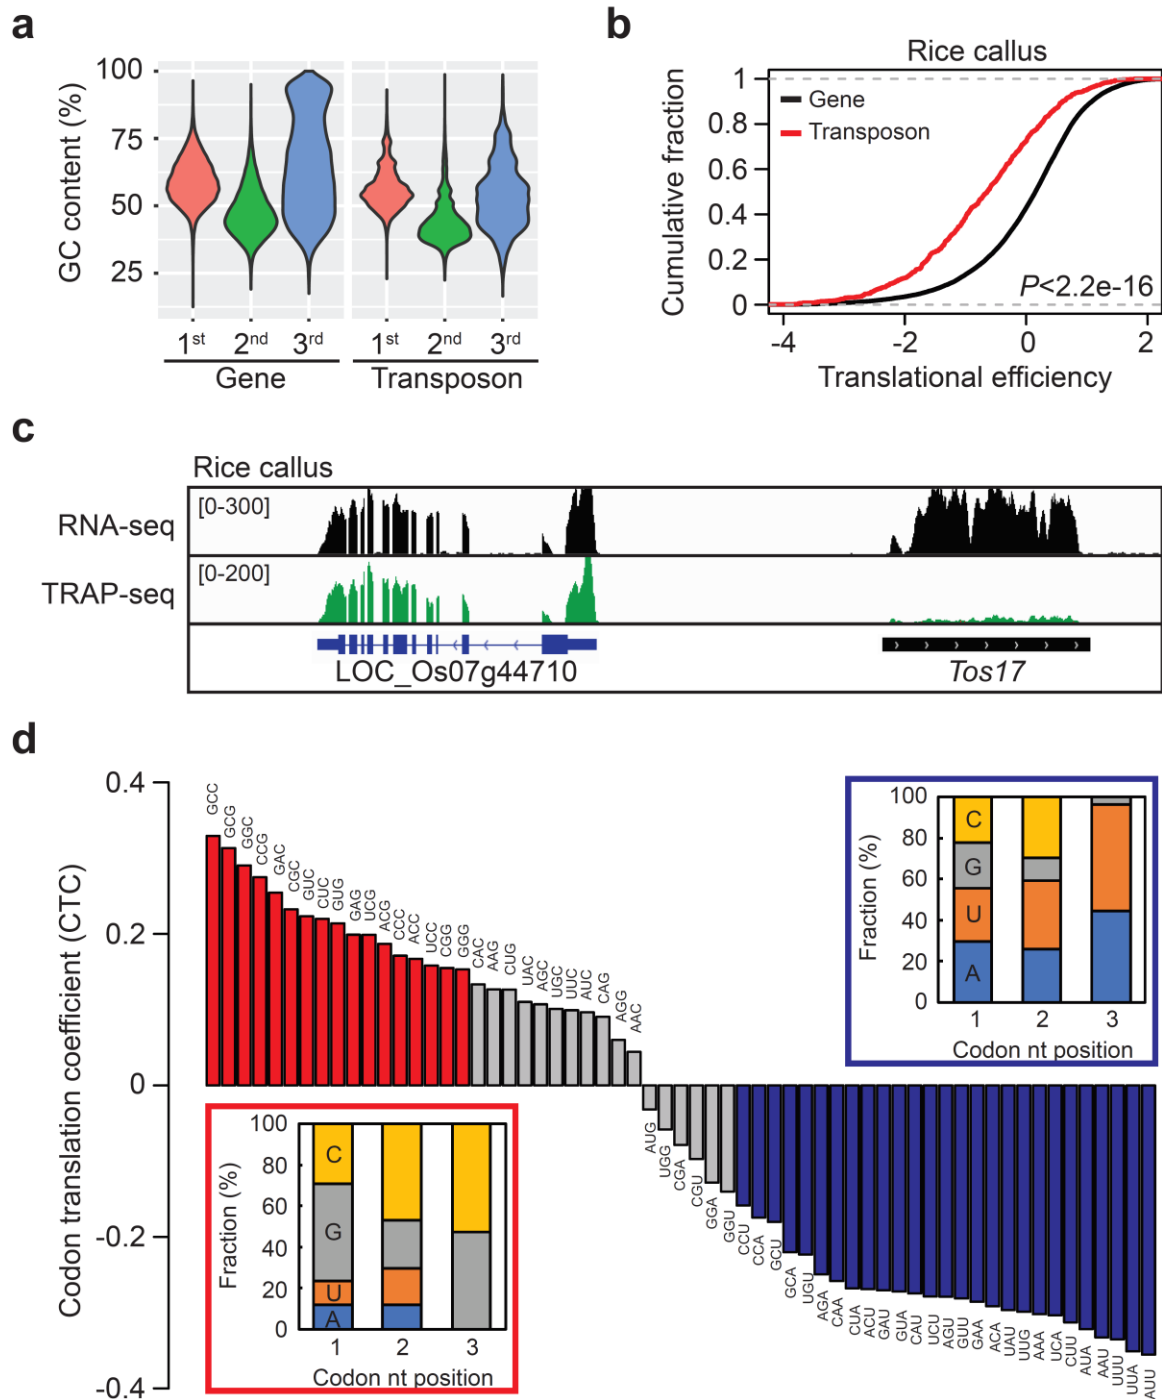

651

652 **Figure 1 | Reduced translational efficiencies of transposons in rice.** **a**, GC contents of

653 genes and transposons of rice shown for different codon nucleotide positions. **b**, Translation

654 efficiency of genes and transposons. Translational efficiency indices (TEI) are determined as

655 the log<sub>2</sub>-ratio of TRAP-seq (Translating Ribosome Affinity Purification followed by mRNA-

656 seq) to RNA-seq. Wilcoxon rank-sum test was carried out for statistical analyses. **c**, RNA-seq

657 (upper) and TRAP-seq (lower) data generated from the rice calli showing *Tos17*  
658 retrotransposon and its neighbouring gene (LOC\_Os07g44710). **d**, Codon translational  
659 coefficient (CTC) plotted from the highest to the lowest. The optimal and suboptimal codons  
660 are colored in red and blue, respectively. Genes with at least FPKM 1 are only considered to  
661 calculate CTC. Insets are the base compositions by codon nucleotide positions. nt, nucleotide.  
662  
663



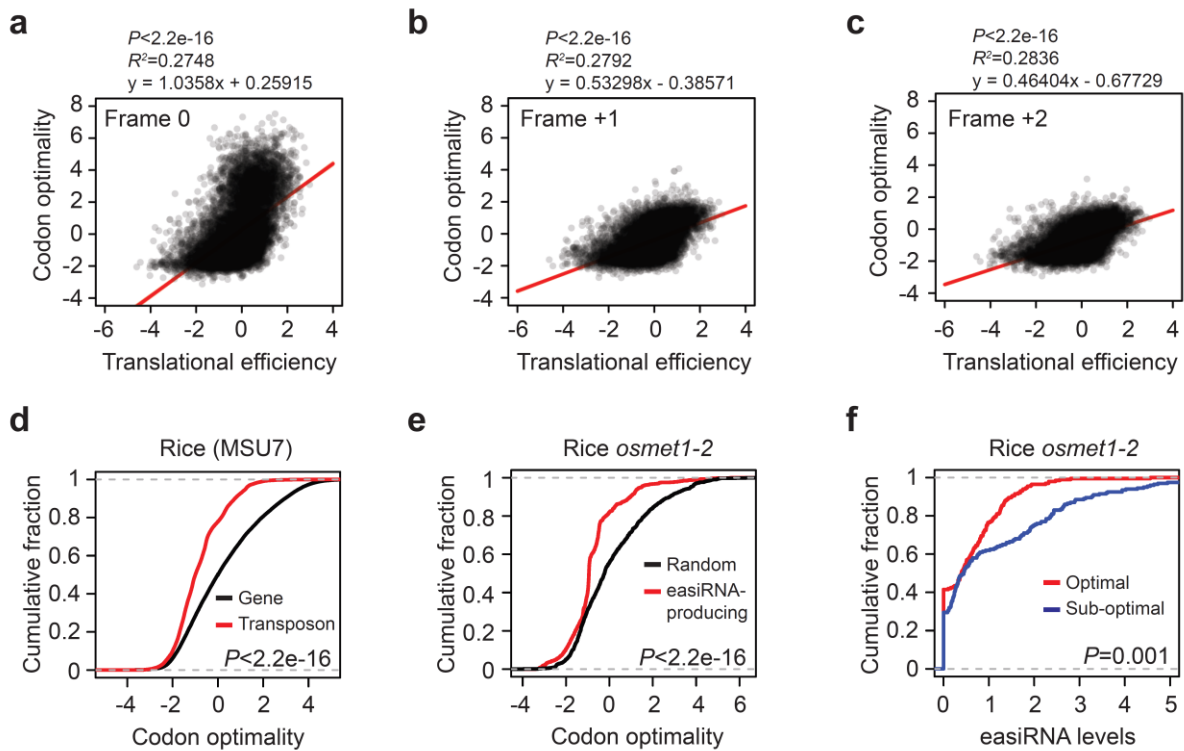

664

665 **Figure 2 | Codon optimality and translational efficiency. a-c**, Correlation of codon  
 666 optimality and TEI. Codon optimality was calculated from the codon sequences determined  
 667 for the in-frame (**a**), frame +1 (**b**) and frame +2 (**c**). The entire transcriptional units annotated  
 668 in the rice MSU7 genome containing both genes and transposons are plotted. Pearson's  
 669 product-moment correlation was used for statistical analyses (**a-c**). **d** and **e**, Comparisons of  
 670 codon optimality between genes and transposons of rice (**d**) and the easiRNA-producing loci  
 671 and randomly selected loci (**e**). The easiRNA-producing loci are the top 1,000 genes ranked  
 672 by the easiRNA levels. **f**, The easiRNA levels in the suboptimal and optimal TEs in the rice  
 673 *osmet1-2* mutant. The optimal and suboptimal TEs are the top 1,000 TEs when ranked from  
 674 the highest and lowest codon optimality, respectively. The levels of easiRNAs were  
 675 expressed as  $\log_2(\text{FPKM}+1)$ . Wilcoxon rank-sum test was used for statistical analyses (**d-f**).

676

677

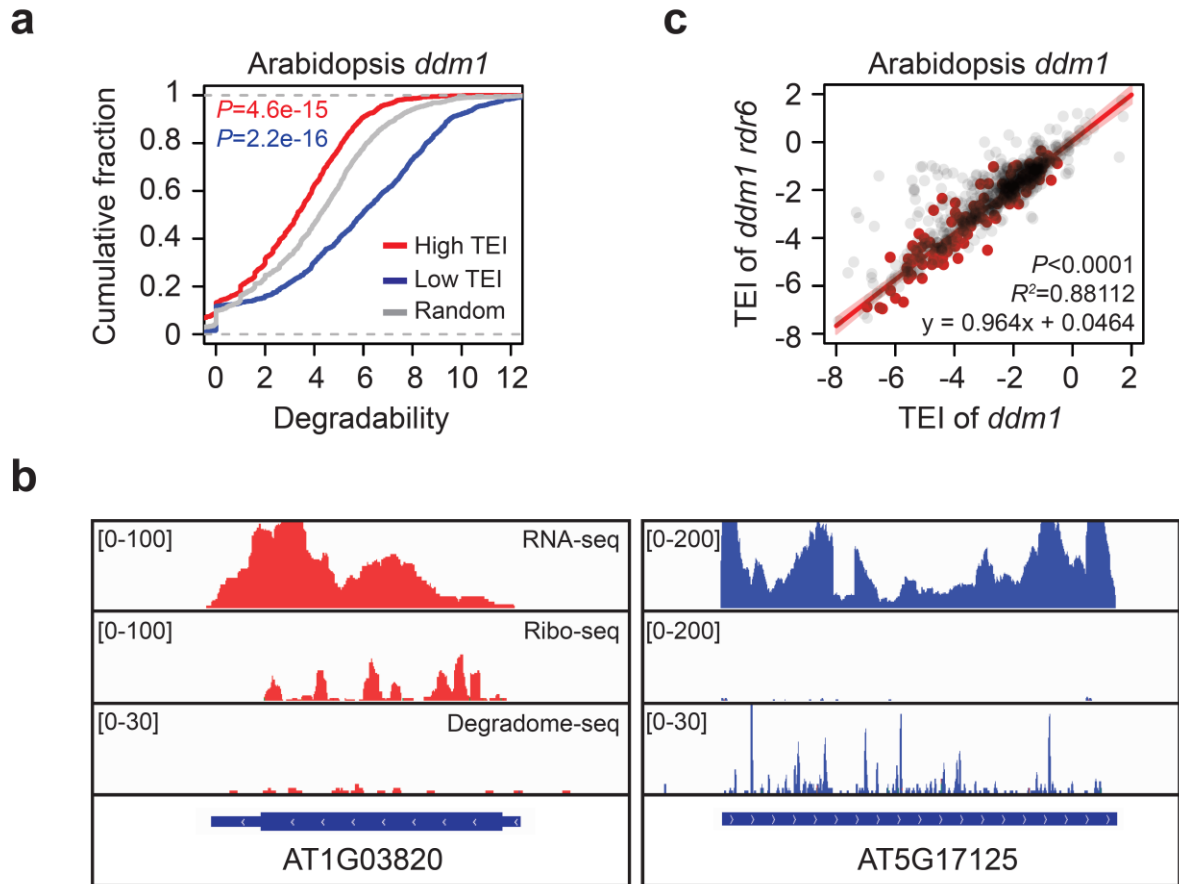

678

679 **Figure 3 | Translational inhibition causes RNA truncation.** **a**, Degradability of high TEI,  
 680 low TEI and random genes in *ddm1* mutant of *Arabidopsis*. The high and low TEI genes are  
 681 the top 1,000 genes when ranked from the highest and lowest TEI genes, respectively.  
 682 Degradability was determined by log<sub>2</sub>-fold change of degradome-seq normalized to RNA-  
 683 seq. *P* values were obtained for the high TEI (red) and low TEI genes (blue) compared to the  
 684 random genes by Wilcoxon rank sum test. **b**, Representative loci for actively translating (red)  
 685 and weakly translating genes (blue) in *ddm1* mutant. From top, RNA-seq, Ribo-seq and  
 686 degradome-seq. **c**, Translation efficiency of *ddm1* and *ddm1 rdr6* double mutant. Red dots  
 687 represent RDR6 targets identified for those with reduced easiRNA levels in *ddm1 rdr6*  
 688 double mutants than in *ddm1* by the log<sub>2</sub>-fold change below -1. Grey dots are expressed  
 689 transposons with FPKM larger than 1. Pearson's product-moment correlation was used for  
 690 statistical analyses.

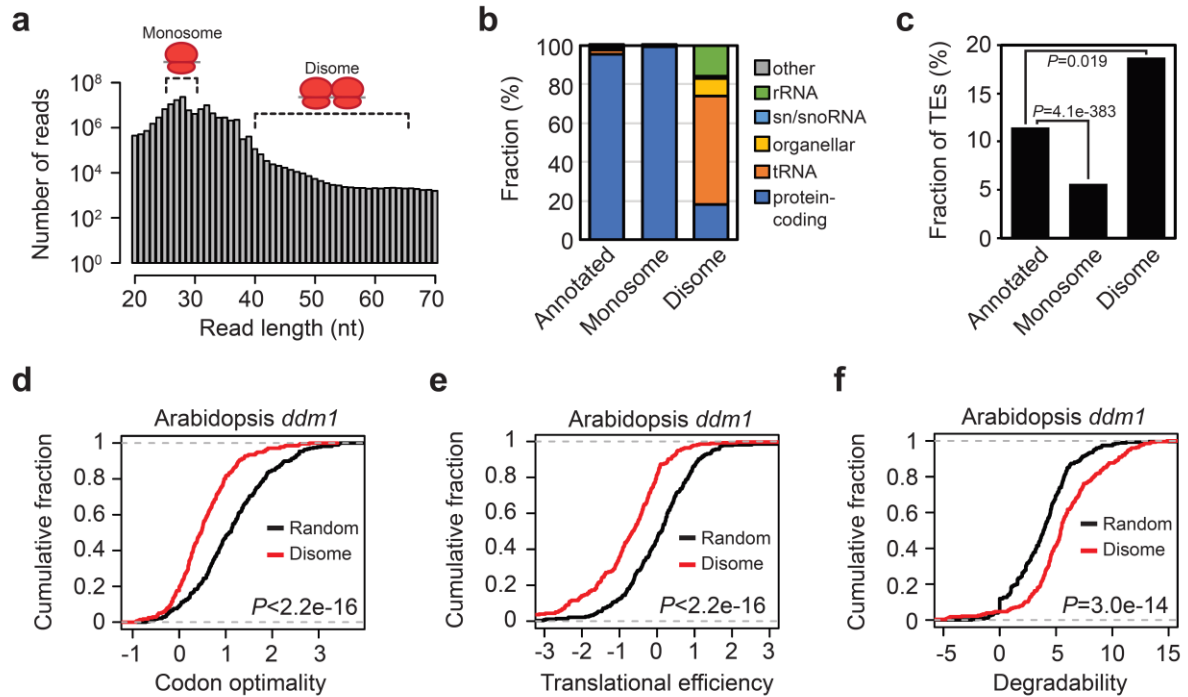

691

692 **Figure 4 | Ribosome queuing and RNA truncation.** **a**, Numbers of reads by read lengths of

693 ribo-seq generated from *ddm1*. Reads ranging from 40 to 65 bp were selected as disome

694 fraction. **b**, Genomic features of disome loci compared with the entire annotated genes and

695 monosome loci of *Arabidopsis*. Monosome and disome loci were selected for those above 1

696 of FPKM. **c**, The fraction of transposons in the annotated, monosome- and disome-containing

697 genes. Hypergeometric test was performed to obtain *P* values. **d-g**, Comparison of disome

698 RNAs for codon optimality (**d**), translation efficiency (**e**) and degradability (**f**). Data

699 generated from *ddm1* mutant was used for the analyses (**d-f**). Wilcoxon rank-sum test was

700 carried out for statistical analyses (**d-f**).

701

702

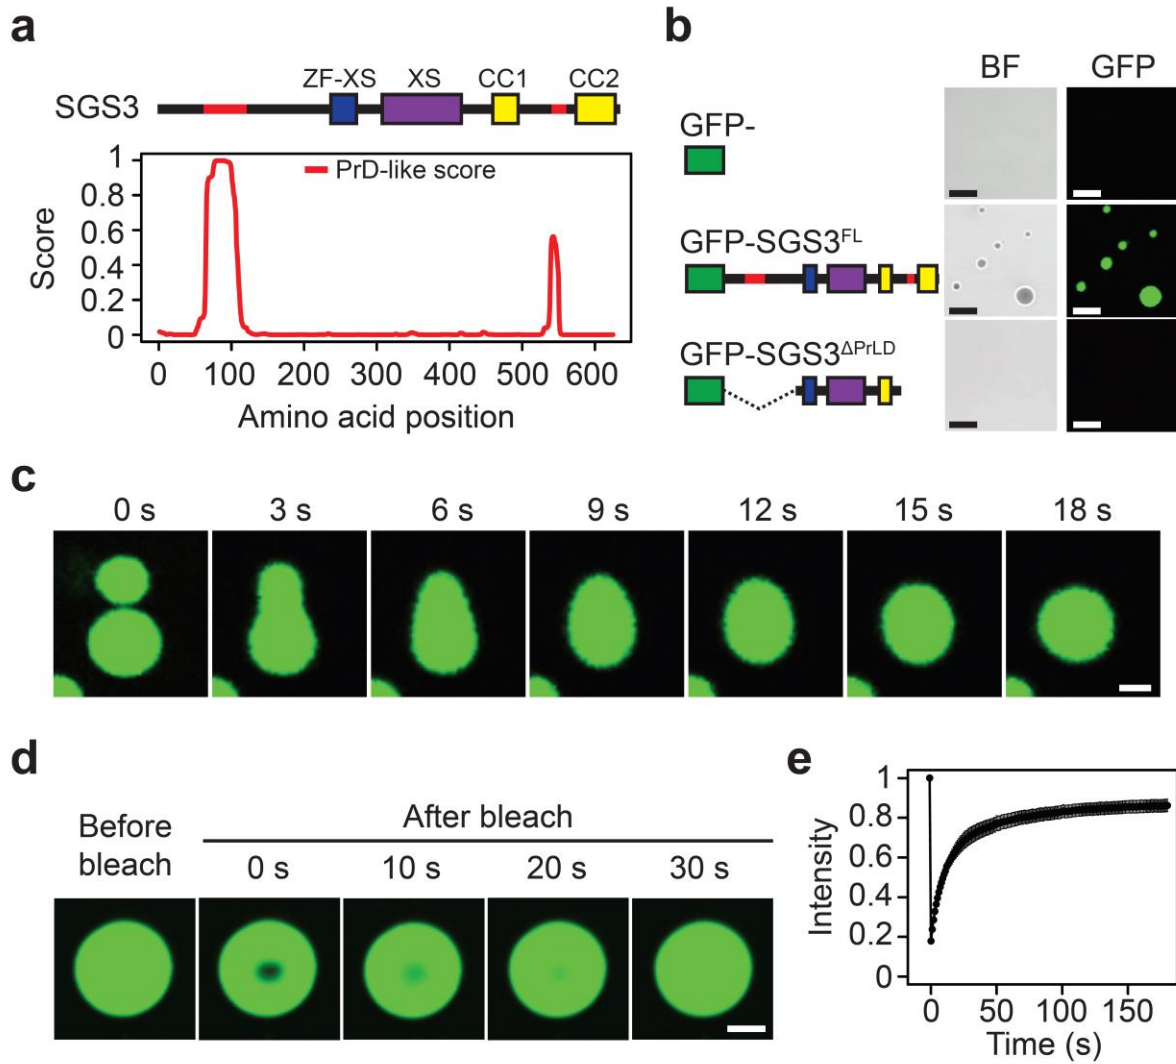

703

704 **Figure 5 | *In vitro* phase separation assay of SGS3.** **a**, Protein domain structure (upper) and

705 PrD-like score (lower) of SGS3. ZF-XS, zinc finger-rice gene X and SGS3; CC, coiled coil;

706 PrD, prion-like domain. **b**, Bright field (left) and fluorescence (right) microscope images of

707 GFP, GFP-tagged SGS3 full length protein and GFP-tagged SGS3 protein without prion-like

708 domains. BF, bright field; FL, full length; PrLD, prion-like domain. Scale bars, 10 μm. **c**,

709 Fluorescence time-lapse microscope images of GFP-SGS3<sup>FL</sup>. Scale bar, 2 μm. **d** and **e**,

710 FRAP of GFP-SGS3<sup>FL</sup> shown as the time-lapse fluorescence microscope images (**d**) and the

711 plot for the fluorescence intensity during the time course of recovery after photobleaching (**e**).

712 Scale bar, 5 μm. Data are presented as mean ± s.d. ( $n = 13$ ).

713

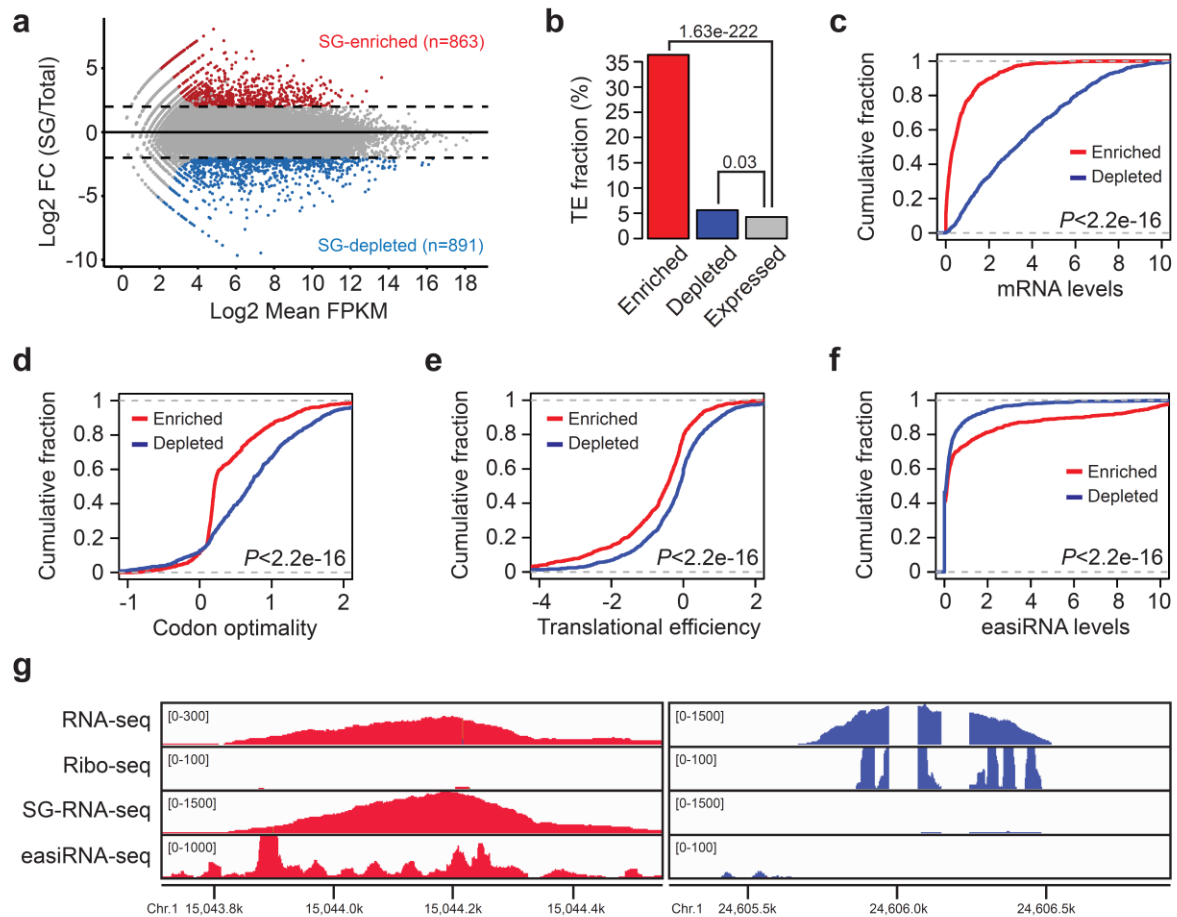

714

715 **Figure 6 | Localization of transposon RNAs to cytoplasmic foci. a**, MA plot for the RNA-

716 seq of the stress granule (SG)-containing cytoplasmic compartments (SG-RNA-seq). SG-

717 enriched (red) and depleted (blue) transcripts are identified by the log<sub>2</sub>-fold change higher

718 than 2 or lower than -2 and FDR values below 0.05. **b**, Fraction of transposons in SG-

719 enriched and depleted transcripts. Genes with FPKM value above 1 were defined as being

720 expressed. Hypergeometric test was used to obtain *P* values. **c-f**, Comparison of SG-enriched

721 and depleted RNAs for the mRNA levels (**c**), codon optimality (**d**), translation efficiency (**e**)

722 and easiRNA levels (**f**). The levels of easiRNAs are expressed as log<sub>2</sub>(FPKM+1). Wilcoxon

723 rank-sum test was performed for statistical analyses (**c-f**). **g**, Genomic loci showing the RNA-

724 seq, ribo-seq, SG-RNA-seq and easiRNA-seq of SG-enriched (left) and depleted (right) TE.

725

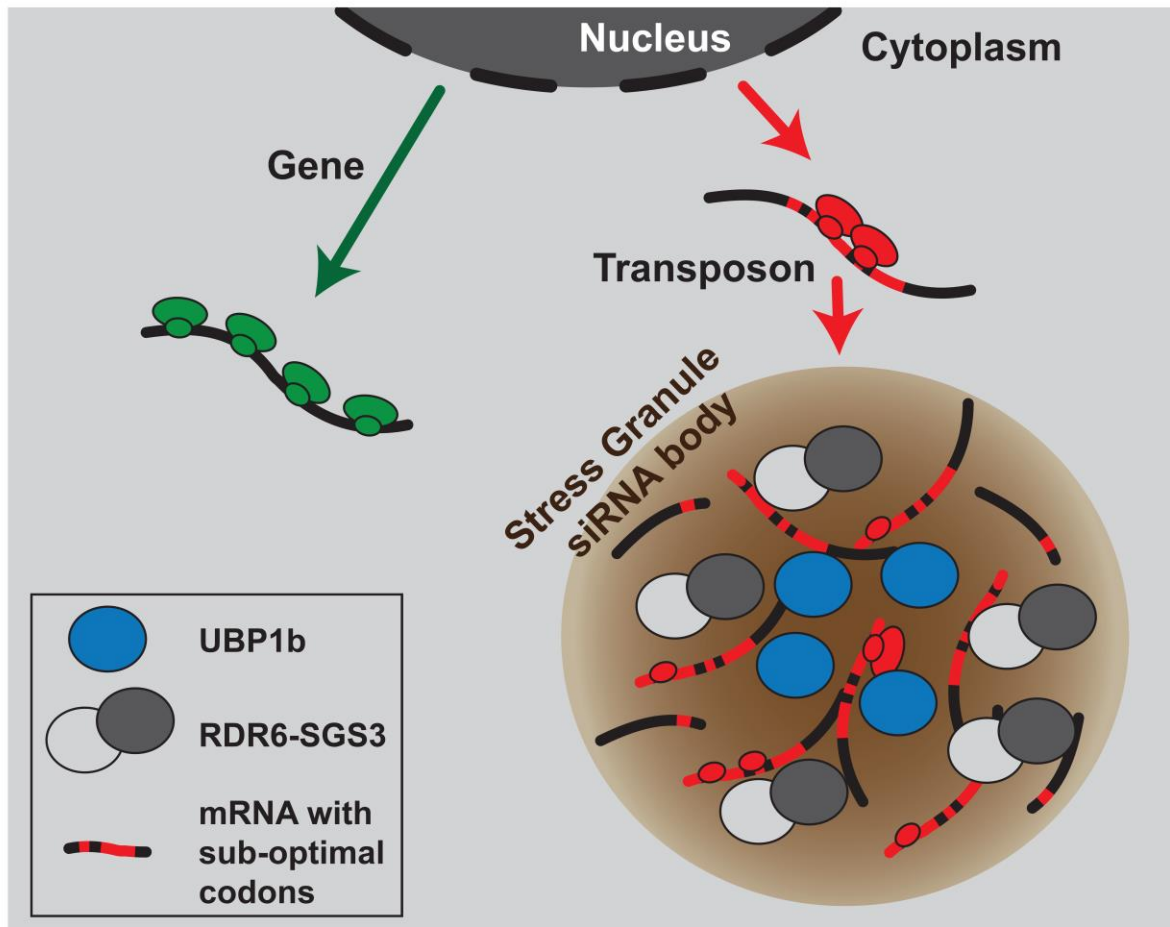

726

727 **Figure 7 | A schematic model for the specific recognition of transposon RNAs and the**  
728 **initiation of easiRNA biogenesis.** Unlike genic mRNAs, transposon RNAs exhibit reduced  
729 translational efficiency because of the suboptimal codon usage. Ribosome stalling leads to  
730 RNA truncation and localization to cytoplasmic foci which collectively contribute to  
731 selective processing of transposon RNAs to easiRNAs.

732

733

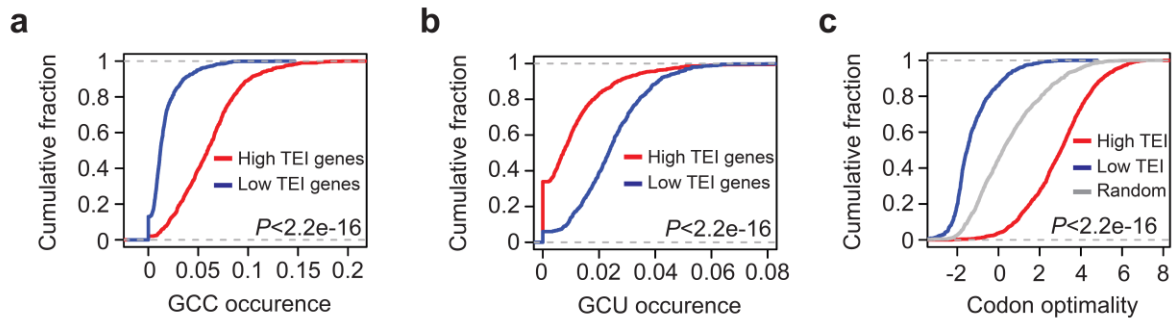

734

735 **Supplementary Fig. S1 | Codon frequency and translation efficiency in rice. a and b,**

736 GCC (a) and GCU (b) codon frequency in highly (red) and lowly translating mRNAs (blue).

737 High and low TEI genes are top 1,000 genes when ranked from the highest and lowest TEI,

738 respectively. TEI, translation efficiency index. c, Codon optimality of high TEI, low TEI and

739 random genes. Wilcoxon rank-sum test was used for statistical analyses (a-c).

740

741

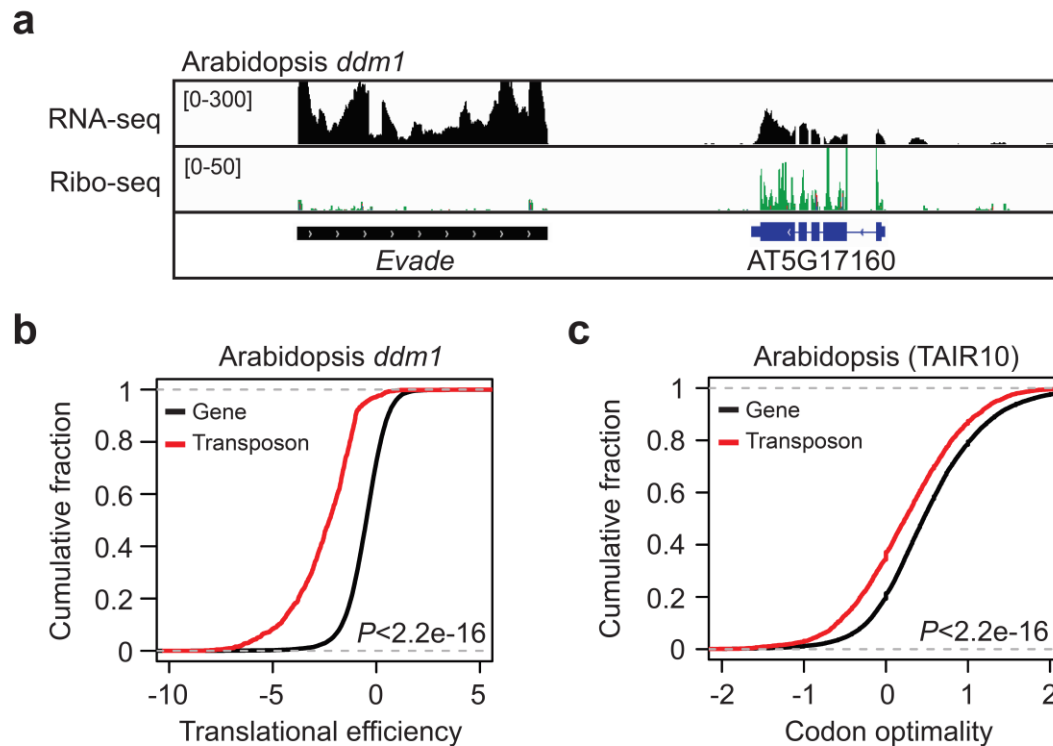

742

743 **Supplementary Fig. S2 | Translation efficiency and codon optimality of *Arabidopsis*. a,**

744 Genomic loci of *Arabidopsis* showing *Evade* retrotransposon and its neighbouring gene

745 (AT5G17160) for RNA-seq (upper) and ribo-seq (lower). **b** and **c**, Comparison of genes and

746 transposons in *Arabidopsis* for translation efficiency (**b**) and codon optimality (**c**). Translation

747 efficiency and codon optimality was as determined in Fig. 1 and 2. Wilcoxon rank-sum test

748 was carried out for statistical analyses (**b** and **c**).

749

750



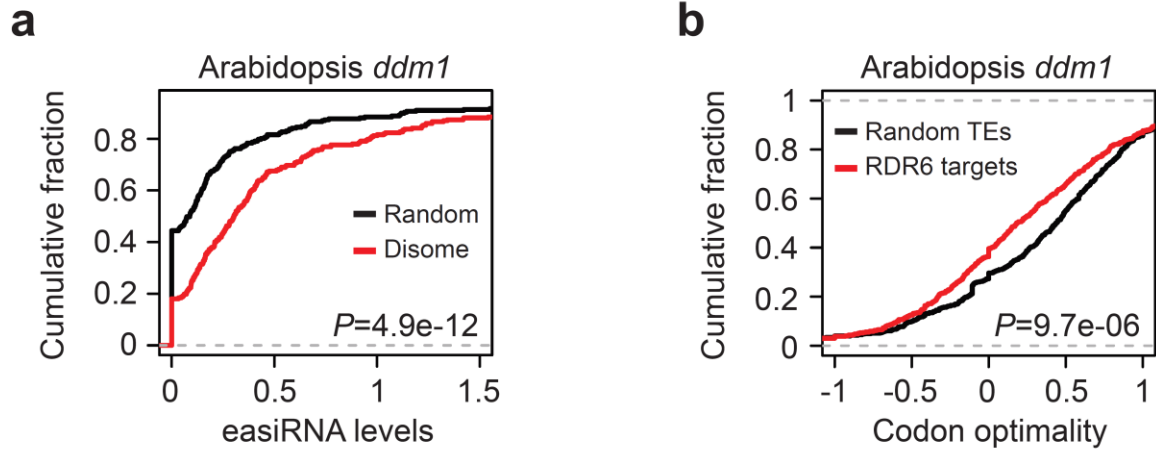

751

752 **Supplementary Fig. S3 | Ribosome stalling and easiRNA production. a**, Comparison of

753 disome RNAs for the easiRNA levels. The levels of easiRNAs are expressed as

754  $\log_2(\text{FPKM}+1)$ . **b**, Codon optimality of RDR6 target transposons. RDR6 targets were

755 identified as in Fig. 3c. Wilcoxon rank-sum test was carried out for statistical analyses.

756

757

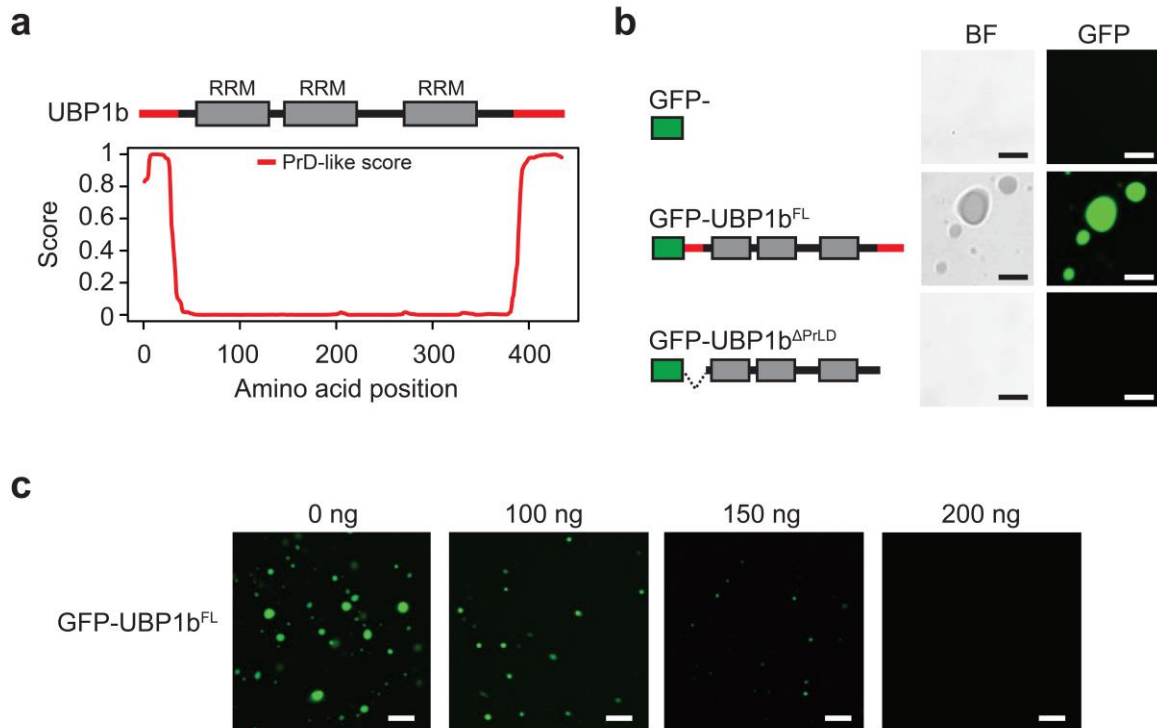

758

759 **Supplementary Fig. S4 | Liquid-liquid phase separation of UBP1b of *Arabidopsis*.** **a,**

760 Protein structure (upper) and PrD-like score (lower) of UBP1b. **b,** *In vitro* phase separation

761 assay. From top to bottom, GFP alone, GFP-tagged UBP1b full length protein and GFP-

762 tagged UBP1b protein with prion-like domains deleted. The assay method was same as in

763 Fig. 5. Scale bars, 10  $\mu$ m. **c,** *In vitro* phase separation assay in the presence of *Arabidopsis*

764 RNA. The assay was carried out using GFP-tagged UBP1b full length protein following the

765 same method as in b. Total RNA extracted from Col-0 seedlings was supplemented for the

766 amount indicated. Scale bars, 20  $\mu$ m.

767

768

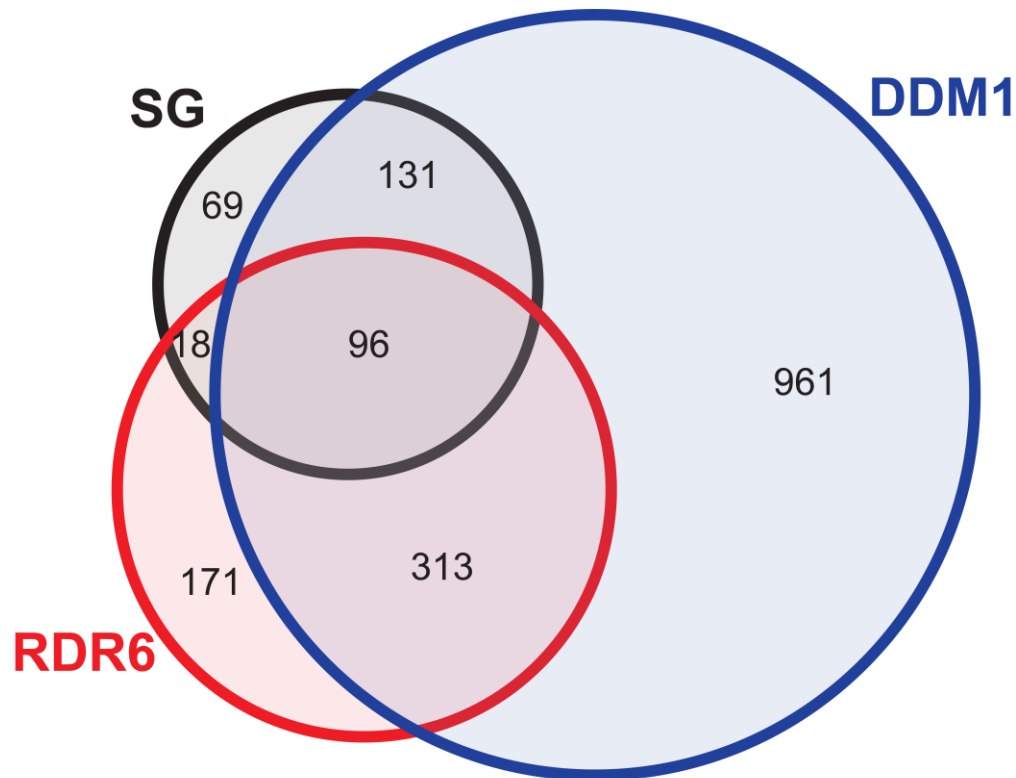

769

770 **Supplementary Fig. S5 | Overlap of SG-enriched transposons with those regulated by**  
771 ***RDR6* and *DDM1*.** Venn diagram showing the transposons enriched in SG (black) and  
772 regulated by *RDR6* (red) and *DDM1* (blue) in *Arabidopsis*. The SG-enriched transposons are  
773 as determined in Fig. 6a. *RDR6* targets are as identified in Fig. 3c. Transposons with  
774 increased expression in *ddm1* relative to the wildtype by at least two-fold were selected as  
775 *DDM1* targets.

776

777

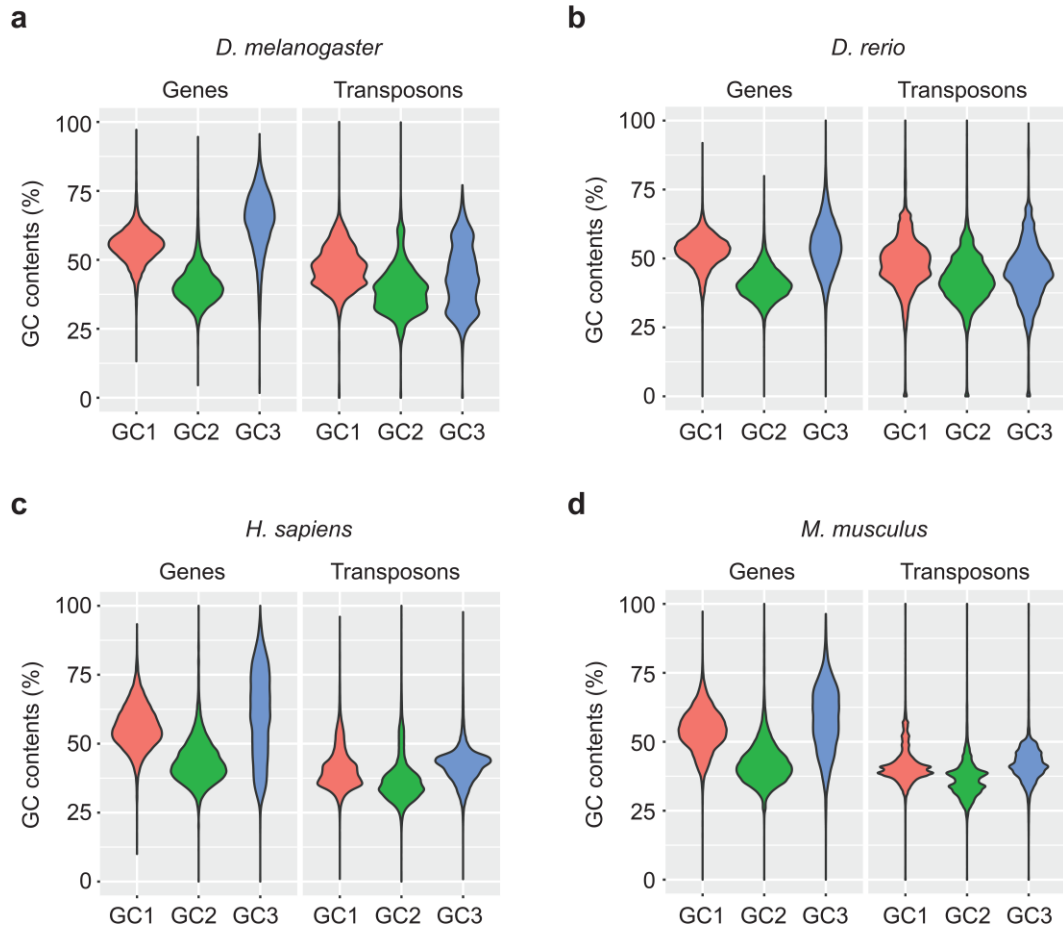

778

779 **Supplementary Fig. S6 | GC contents of genes and transposons in various species. GC1,**

780 GC2 and GC3 of fruit fly (a), zebrafish (b), human (c) and mouse (d) shown for genes and

781 transposons separately.

782

783

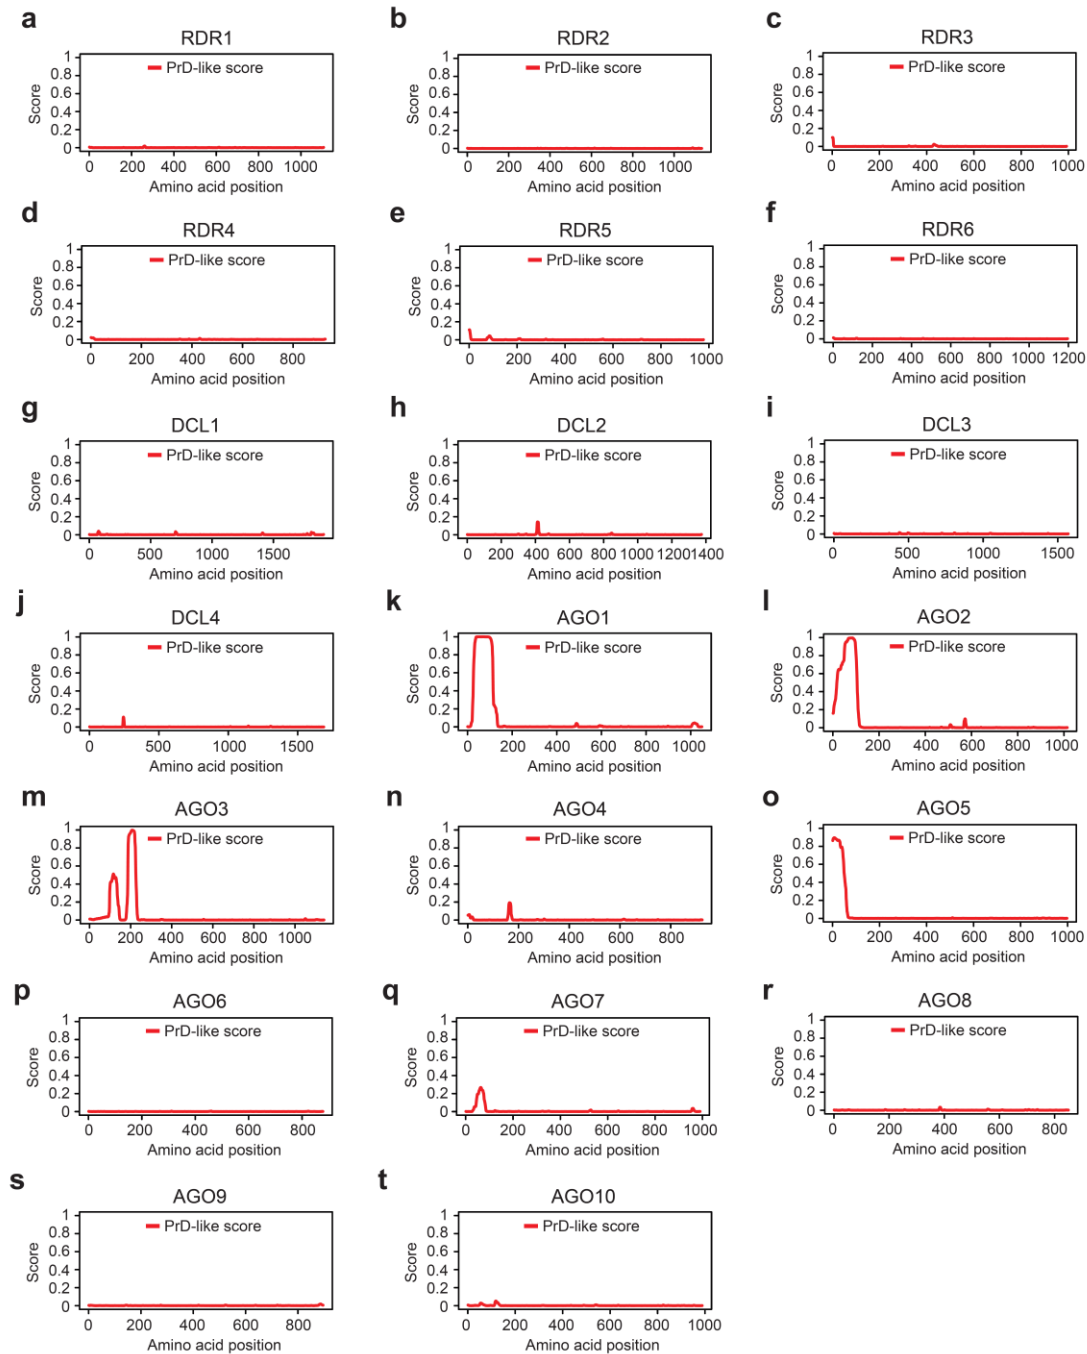

784

785 **Supplementary Fig. S7 | Prediction of prion-like domains in the siRNA biogenesis**

786 **factors in *Arabidopsis*.** Prion-like domains of RDR (a-f), DCL (g-j) and AGO (k-t) family

787 proteins. The prediction was performed using the web-based tool PLAAC

788 (<http://plaac.wi.mit.edu/>).

789

790

791 **Supplementary Table S1 | Oligonucleotides used in this study.**

792 The underlined is the restriction enzyme recognition sites.

| Name               | Sequence (5' → 3')               |
|--------------------|----------------------------------|
| eGFP-BamHI-F       | CGGGATCCATGGTGAGCAAGGGCGAGGA     |
| eGFP-EcoRI-R       | GGAATTCGTACAGCTCGTCCATGCCGT      |
| SGS3-FL-SacI-F     | ATCGAGCTCATGAGTTCTAGGGCTGGTCC    |
| SGS3-FL-SalI-R     | ATAGTCGACTCAATCATCTTCATTGTGAAGGC |
| SGS3-ΔPrLD-SacI-F  | ATCGAGCTCCAGAATAAGTGGTTCAAAAAG   |
| SGS3-ΔPrLD-SalI-R  | ATAGTCGACTCAAAACCTGTCGTGTGCATCC  |
| UBP1b-FL-SalI-F    | GCGTCGACgtATGCAGAGGTTGAAGCAGCA   |
| UBP1b-FL-XhoI-R    | CCCTCGAGTTACTGGTAGTACATGAGCTGCT  |
| UBP1b-ΔPrLD-SalI-F | GCGTCGACgtATGCATCCTGGTCTCCTTGCC  |
| UBP1b-ΔPrLD-XhoI-R | CCCTCGAGCATCTTGCTCATCGCTAGTTG    |

793

794

795 **Supplementary Table S2 | Summary of NGS data generated in this study.**

796 The NGS data generated in this study is publicly available under the accession code of

797 PRJNA598331.

| <b>Samples</b>                           | <b>Raw Reads</b> | <b>Clean Reads</b> | <b>Total mapped</b> | <b>Uniquely mapped</b> |
|------------------------------------------|------------------|--------------------|---------------------|------------------------|
| RNA-seq_Col-0_rep1 (cont. for ribo-seq)  | 46,047,126       | 45,139,810         | 41,008,120          | 40,258,122             |
| RNA-seq_Col-0_rep2 (cont. for ribo-seq)  | 52,046,884       | 51,109,468         | 49,844,718          | 48,878,726             |
| RNA-seq_ddd1_rep1 (cont. for ribo-seq)   | 55,317,172       | 52,539,734         | 50,841,654          | 49,729,545             |
| RNA-seq_ddd1_rep2 (cont. for ribo-seq)   | 46,567,406       | 45,892,166         | 44,687,347          | 43,731,004             |
| Ribo-seq_Col-0_rep1                      | 52,578,246       | 44,527,711         | 37,801,610          | 24,303,506             |
| Ribo-seq_Col-0_rep2                      | 69,952,186       | 56,604,548         | 47,020,134          | 32,101,023             |
| Ribo-seq_ddd1_rep1                       | 54,417,340       | 44,004,965         | 40,747,657          | 30,115,491             |
| Ribo-seq_ddd1_rep2                       | 53,154,939       | 42,013,949         | 34,065,658          | 24,189,782             |
| RNA-seq_ddd1_rep1 (cont. for SG-RNA-seq) | 45,631,136       | 44,664,672         | 42,910,976          | 41,950,104             |
| RNA-seq_ddd1_rep2 (cont. for SG-RNA-seq) | 46,119,730       | 45,224,068         | 43,911,352          | 42,952,790             |
| SG-RNA-seq_ddd1_rep1                     | 48,818,762       | 47,898,388         | 45,802,796          | 44,772,760             |
| SG-RNA-seq_ddd1_rep2                     | 43,518,858       | 42,765,376         | 41,143,912          | 40,206,878             |
| RNA-seq_ddd1_rdr6 (cont. for ribo-seq)   | 48,973,288       | 48,355,352         | 47,545,301          | 46,384,306             |
| RNA-seq_ddd1 (cont. for ribo-seq)        | 61,952,662       | 61,003,038         | 60,094,792          | 58,439,072             |
| Ribo-seq_ddd1_rdr6                       | 61,093,198       | 45,421,998         | 41,647,461          | 21,400,901             |
| Ribo-seq_ddd1                            | 62,576,020       | 50,498,998         | 34,532,242          | 10,298,192             |

798
